# Supplementary material for: Octyl itaconate enhances VSVΔ51 oncolytic virotherapy by multitarget inhibition of antiviral and inflammatory pathways
Source: Nat Commun. 2024 May 15;15:4096. doi: 10.1038/s41467-024-48422-x (PMC11096414; doi:10.1038/s41467-024-48422-x)
Supplement: Supplementary file 1 — Supplementary Information [file 41467_2024_48422_MOESM1_ESM.pdf]

# **Octyl-Itaconate Enhances VSVΔ51 Oncolytic Virotherapy by Multitarget Inhibition of Antiviral and Inflammatory Pathways**

Naziia Kurmasheva *et al.*

This PDF file includes:

- Supplementary Figures 1-19
- Supplementary Tables 1-6
- Supplementary Methods (Copies of NMR spectra)

**Supplementary Figures 1-19**

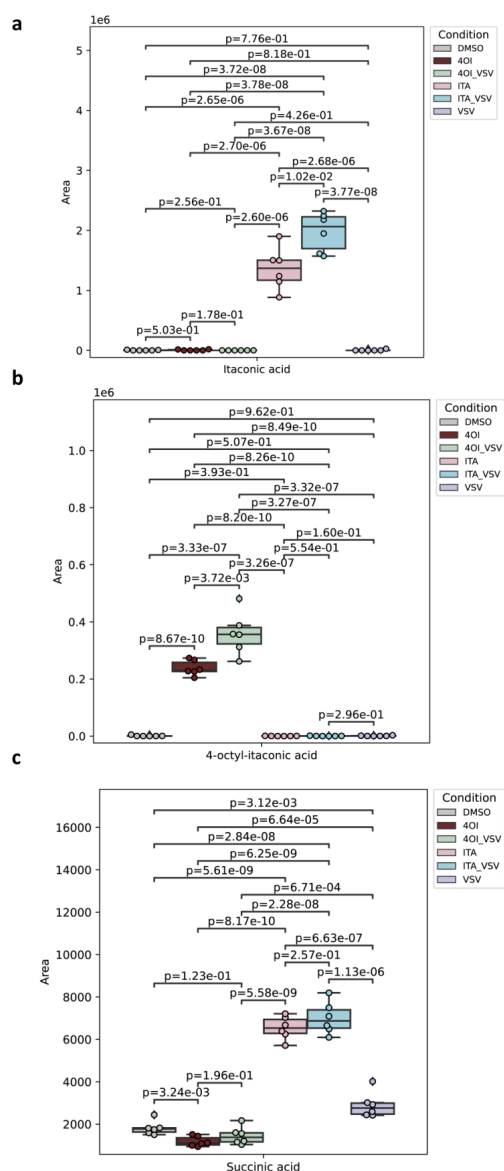

**Figure S1. Modulation of metabolites production in 4-OI vs itaconate-treated and VSVΔ51-infected cancer cells**

**a-c** 786-O cells were either pre-treated with 4-OI (75  $\mu$ M) or itaconate (10 mM) for 24 hrs and subsequently infected with VSV $\Delta$ 51 (MOI 0.01) for 17 hours. Metabolites were measured by LC mass spectrometry. Data come from one experiment performed in sextuplicate. Data are depicted as: each box shows the interquartile range (IQR) extending between [Q1, Q3], the line inside the box indicates the median value, the “whiskers” extend to points that lie within 1.5 IQRs of Q1 and Q3. Statistics indicate significance by two-tailed Student’s t-test for **a-c**. Source data are provided as a Source Data file.

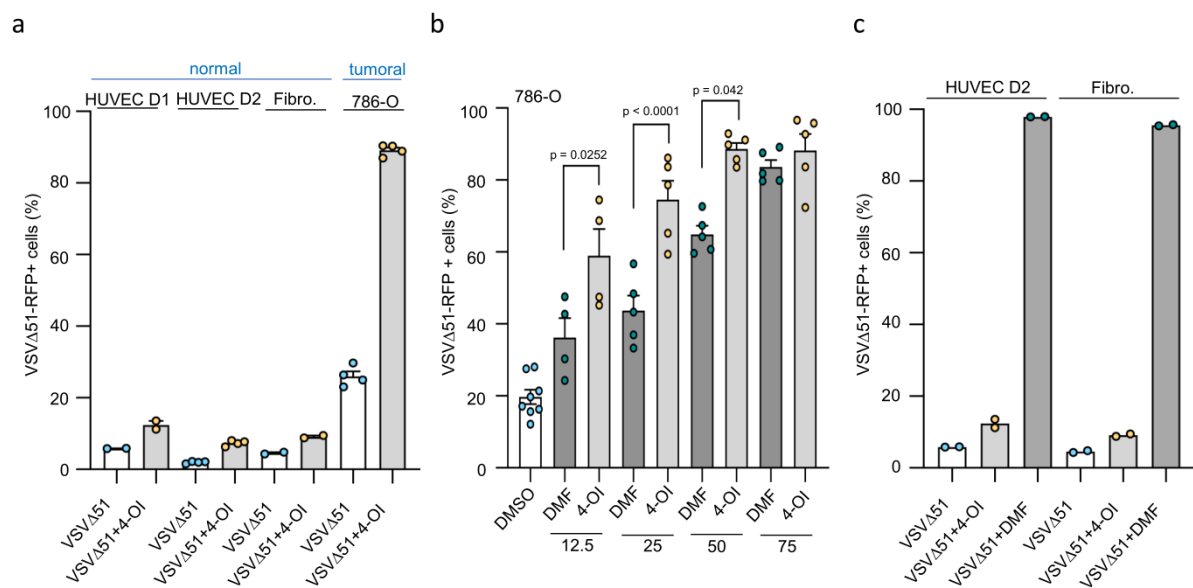

**Figure S2. 4-OI outperforms the OV boosting capacity of dimethyl fumarate in vitro and does not enhance VSVΔ51 infection in non-tumoral cells**

**a** Primary HUVECs from two different donors (D1 and D2), primary human fibroblasts and tumoral 786-O cells were pre-treated with 4-OI (125 μM) for 24 hours and subsequently infected with VSVΔ51 (MOI 0.01) for 17 hours. The number of infected RFP+ cells was quantified by flow cytometry.

**b** 786-O cells were pre-treated with the indicated concentrations of 4-OI or dimethyl fumarate (DMF) for 24 hours and subsequently infected with VSVΔ51 (MOI 0.01) for 17 hours. The number of infected RFP+ cells was quantified by flow cytometry.

**c** Primary HUVECs from donor 2 (D2), and primary human fibroblasts were pre-treated with 4-OI (125 μM) or DMF (100 μM) for 24 hours and subsequently infected with VSVΔ51 (MOI 0.01) for 17 hours. The number of infected RFP+ cells was quantified by flow cytometry. Data are depicted as means ± SEM from two experiments performed in duplicate in **a** and from two experiments performed in triplicate and quadruplicate in **b**. Data are depicted as means ± SEM from one experiment performed in duplicate in **c**. Statistics indicate significance by one-way ANOVA for **b**. Source data are provided as a Source Data file.

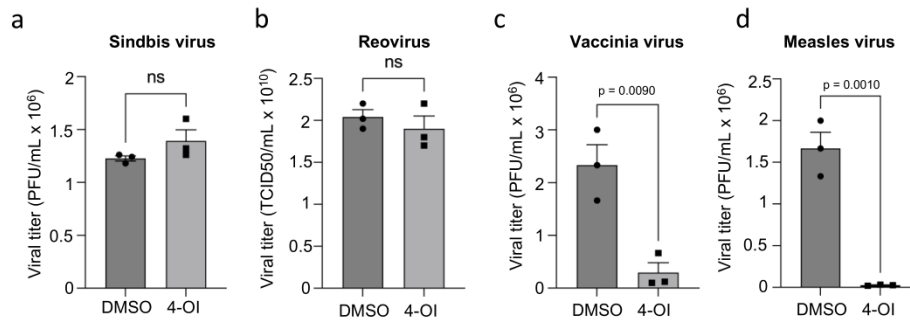

**Figure S3. 4-OI restricts infection of oncolytic Vaccinia and Measles in cancer cells and has no effect on Sindbis and Reovirus infection**

**a** 786-O cells were pre-treated with 4-OI (100  $\mu$ M) for 24 hours and subsequently infected with Sindbis virus (MOI 10) for 48 hrs. Viral titers were determined in the supernatants of infected cells by plaque assay.

**b-d** PANC1 cells were pre-treated with 4-OI (125  $\mu$ M) for 24 hours and subsequently infected with Reovirus ( $10^6$  TCID50/ml), vaccinia virus (MOI 0.01) and Measles virus (MOI 0.1) for 48 hrs. Viral titers were determined in the supernatants of infected cells by plaque assay or TCID50. Data are depicted as means  $\pm$  SEM from one experiment performed in triplicate in **a-d**. Statistics indicate significance by two-tailed Student's t-test for **a-d**. Source data are provided as a Source Data file.

a

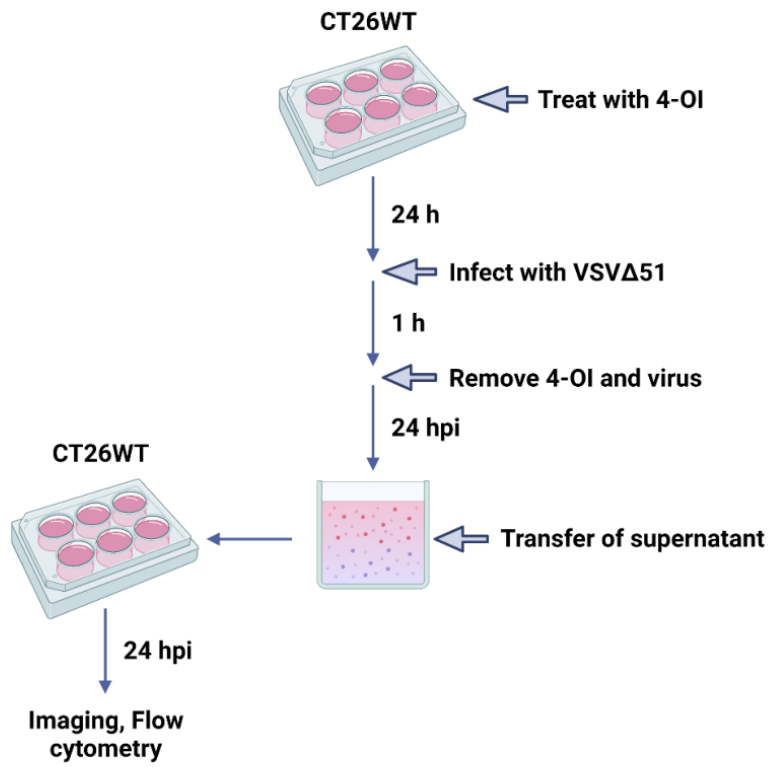

b

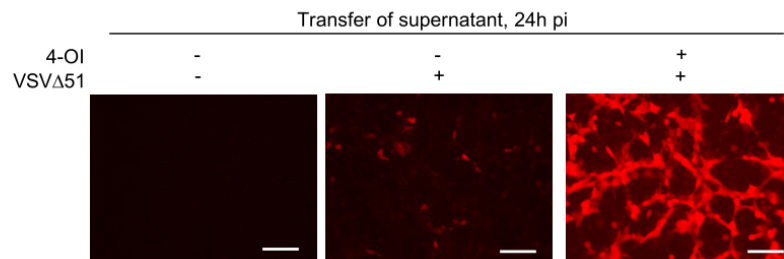

c

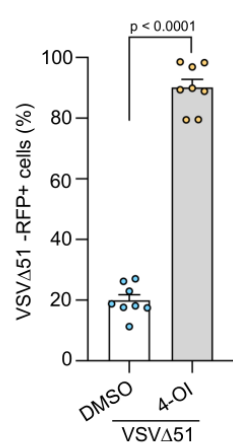

d

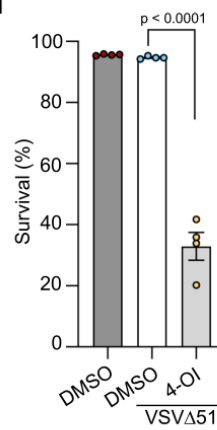

*Figure on previous page*

**Figure S4. Transfer of supernatants from virus-infected and 4-OI-treated cells can promote OV infection in bystander untouched cancer cells**

**a** Schematic representing the layout of the supernatant transfer experiment. CT26WT cells were treated with 4-OI (125  $\mu$ M) for 24hrs following 1h incubation with VSV $\Delta$ 51 (MOI 0.01). The supernatants containing virus were washed off and replaced by fresh medium (not containing virus or 4-OI). 24 hrs later these media were transferred to freshly plated CT26WT cells for another 24 hrs. Infectivity and survival were assessed 24 hrs after incubation with the supernatants.

**b-d** Supernatants containing virus from 4-OI- or DMSO-stimulated CT26WT cells was transferred to bystander untouched cells for 24 hours. Infectivity was assessed by fluorescence microscopy (**b**) (Scale bars, 100  $\mu$ m) or flow cytometry of RFP<sup>+</sup> cells (**c**).

Data are depicted as means  $\pm$  SEM from two experiments performed in quadruplicate in **c** and from two experiments performed in duplicate in **d**. Pictures in are representative of one experiment performed three times in **c**. Statistics indicate significance by two-tailed Student's t-test for **c** and one-way ANOVA in **d**. Panel **a** has been created using BioRender.com. Source data are provided as a Source Data file.

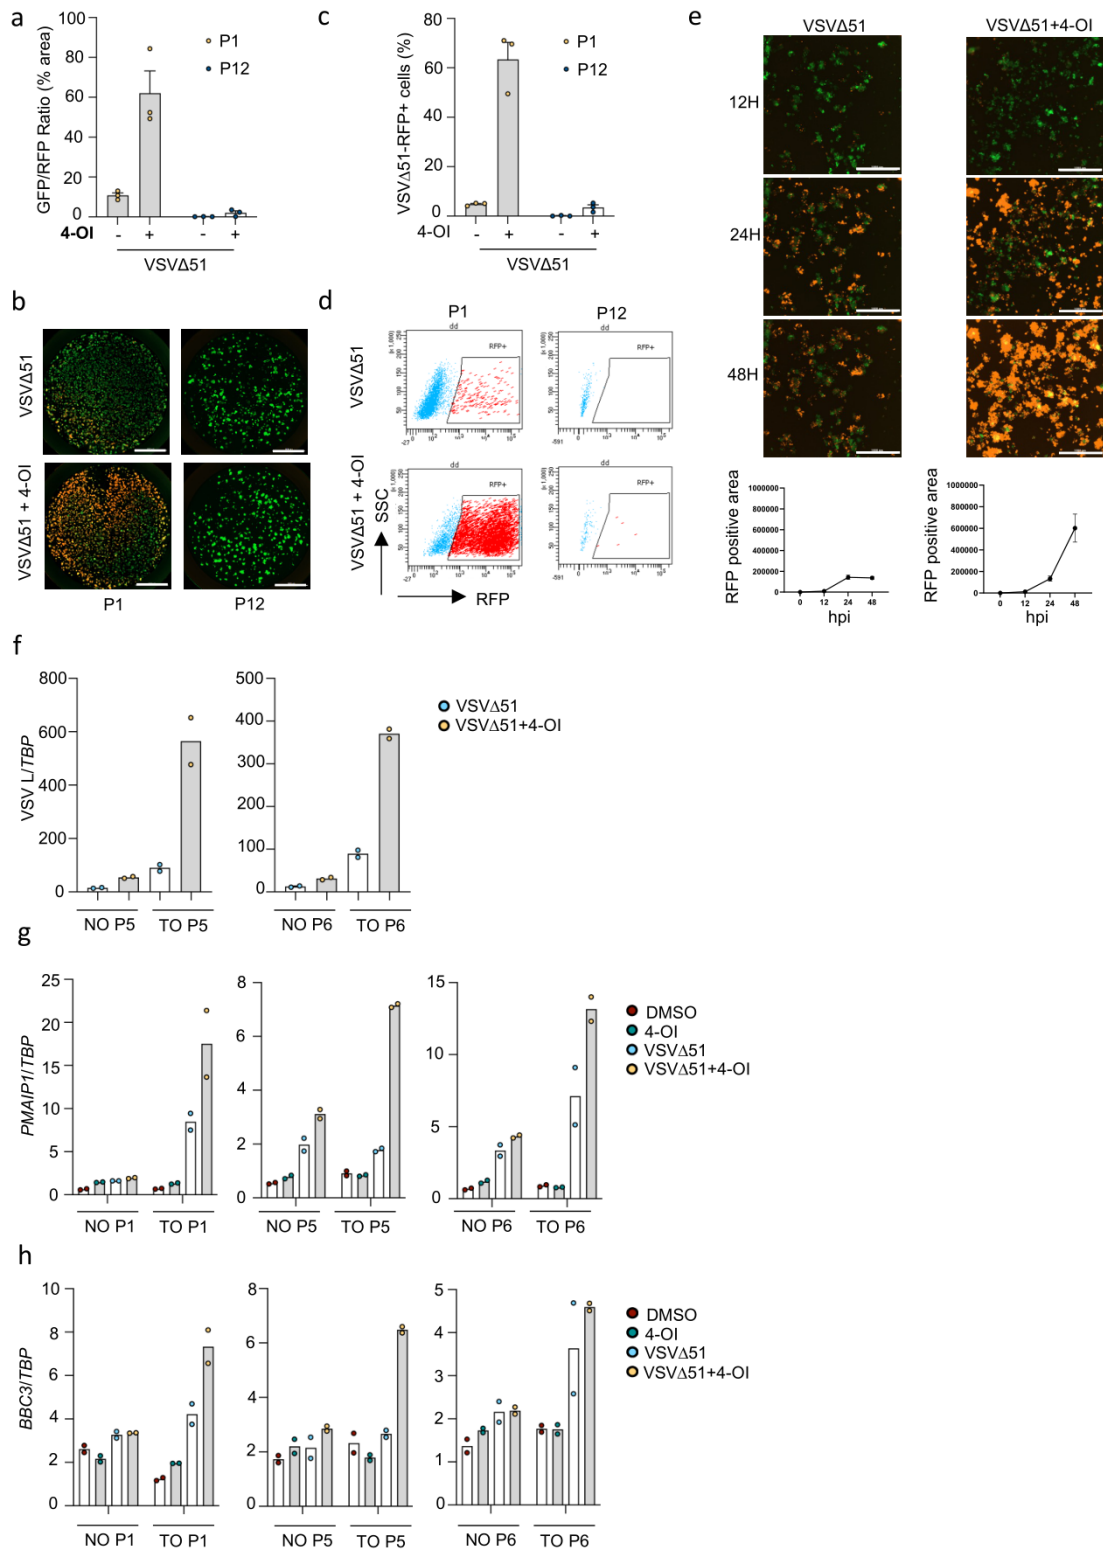

*Figure on previous page*

**Figure S5. 4-OI increases oncolytic infectivity and killing by VSVΔ51 in 3D patient-derived colon cancer tumoroids**

**a-b** Fluorescence area quantification (48-well plate) to evaluate the infectivity of VSVΔ51-RFP infection ( $1 \times 10^6$  pfu/well) solely, and in combination with 4-OI (125  $\mu$ M), within colon cancer organoids derived from two patients (P1 and P12) 48 hours post infection. To assess for total organoid area, organoids were either transduced with GFP or stained with calcein green. Scale bars, 3000  $\mu$ m.

**c-d** Flow cytometry counts of infected RFP-positive cells from enzymatically digested colon tumoroids in patient 1 and 12 (P1 and P12) at 48 hours post infection with VSVΔ51 infection ( $1 \times 10^6$  pfu/well) in the presence or not of 4-OI (125  $\mu$ M).

**e** RFP area signal from VSVΔ51-RFP ( $1 \times 10^6$  pfu/well) to evaluate virus infection solely or in combination with 4-OI (125  $\mu$ M), within colon cancer organoids derived from one patient (P1) at different time post infection. Scale bars, 1000  $\mu$ m.

**f** qPCR analysis of VSV L gene expression within colon NO (normal) and TO (tumoral) organoids from patient 5 (P5) and patient 6 (P6), one day post infection with VSVΔ51 ( $1 \times 10^6$  pfu/well) in the presence or not of 4-OI (125  $\mu$ M)

**g-h** qPCR analysis of NOXA (*PMAIP1*) (g) and PUMA (*BBC3*) (h) gene expression within colon NO (normal) and TO (tumoral) organoids from different patients (P1, P5 and P6), one day post infection with VSVΔ51 ( $1 \times 10^6$  pfu/well) in the presence or not of 4-OI (125  $\mu$ M). Data are depicted as means  $\pm$  SEM from one experiment performed in biological triplicates from two patients in **a,b**, from one experiment performed in biological triplicates from two patients in **c-d**, from one experiment on one patient in **e**, from one experiment performed in biological duplicates in two to three patients in **f-h**. Source data are provided as a Source Data file.

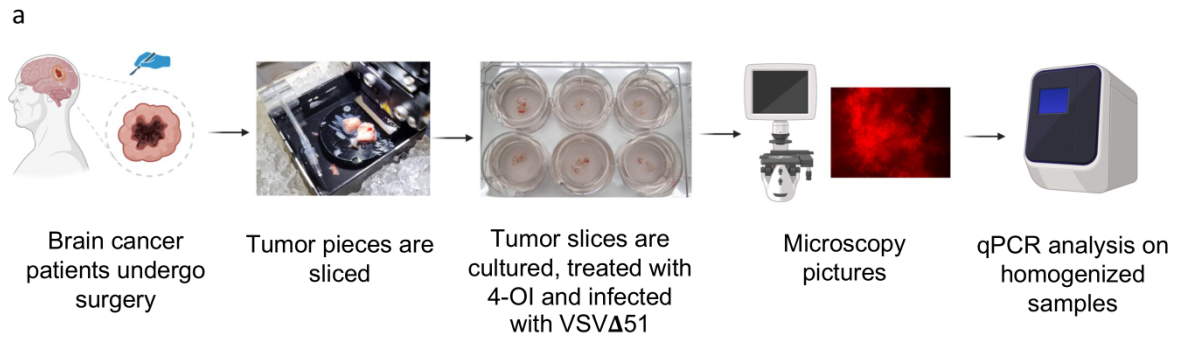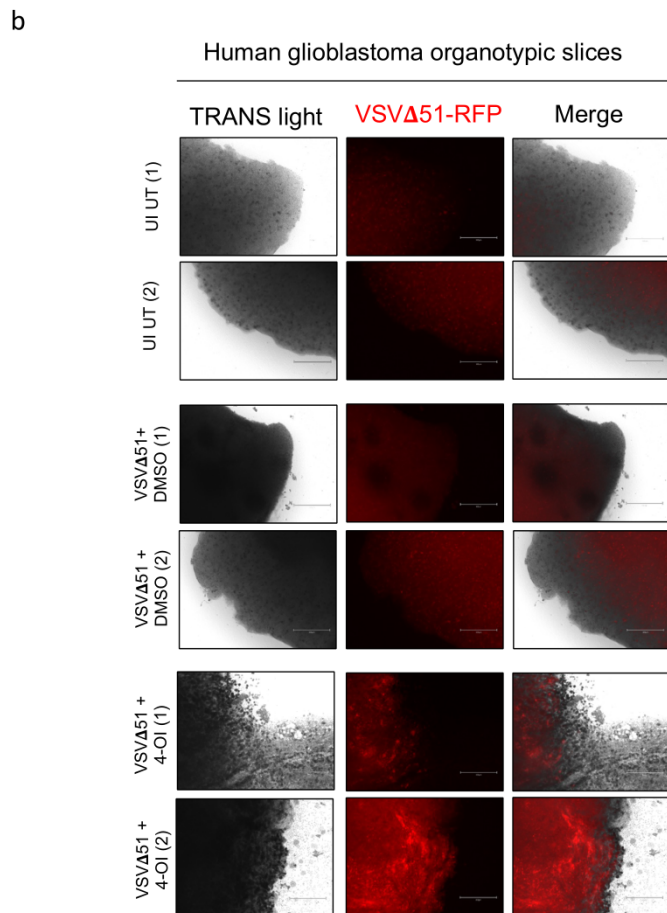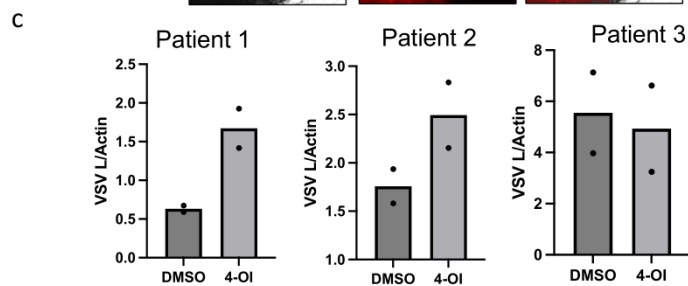

*Figure on previous page*

**Figure S6. 4-OI increases VSV $\Delta$ 51 in patient-derived organotypic brain cancer slices**

**a** Schematic highlighting the procedure of the experiment.

**b** Organotypic glioblastoma slices were infected with VSV $\Delta$ 51-RFP ( $4 \times 10^6$  PFU) in the presence of 4-OI (125  $\mu$ M) for 20 hrs. Infectivity of the slices was assessed by fluorescence imaging. Scale bars, 300  $\mu$ m.

**c** qPCR analysis of VSV L gene expression within the tumor slices from four patients; 20 hours post infection with VSV $\Delta$ 51 ( $4 \times 10^6$  PFU) in the presence or not of 4-OI (125  $\mu$ M) (P1), 40 hours post infection with VSV $\Delta$ 51 ( $8 \times 10^6$  PFU) in the presence or not of 4-OI (125  $\mu$ M) (P2-P3). Data are from one experiment performed on three different patients (**Table S2**). For the qPCR, experiments were done in biological duplicates and display the means. Panel **a** has been created using BioRender.com. Source data are provided as a Source Data file.

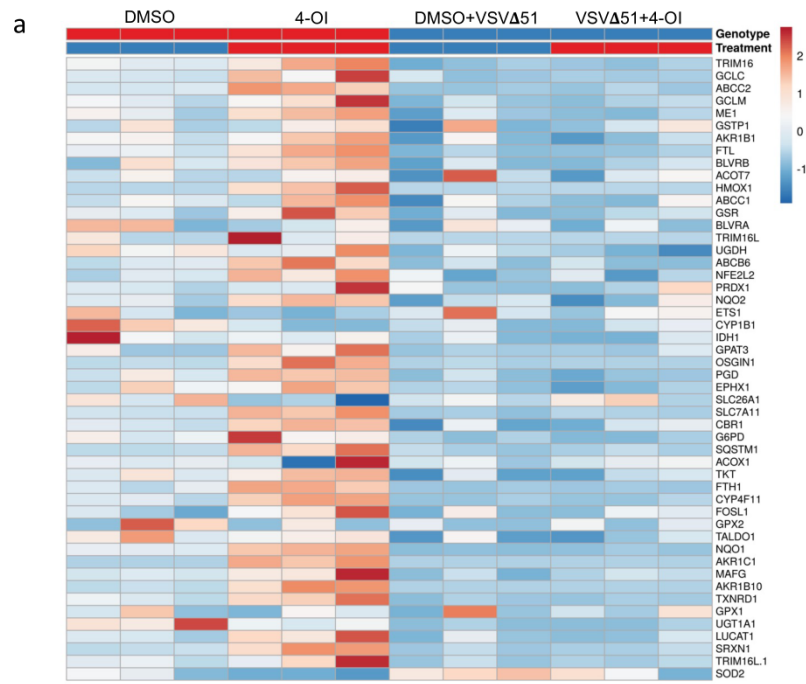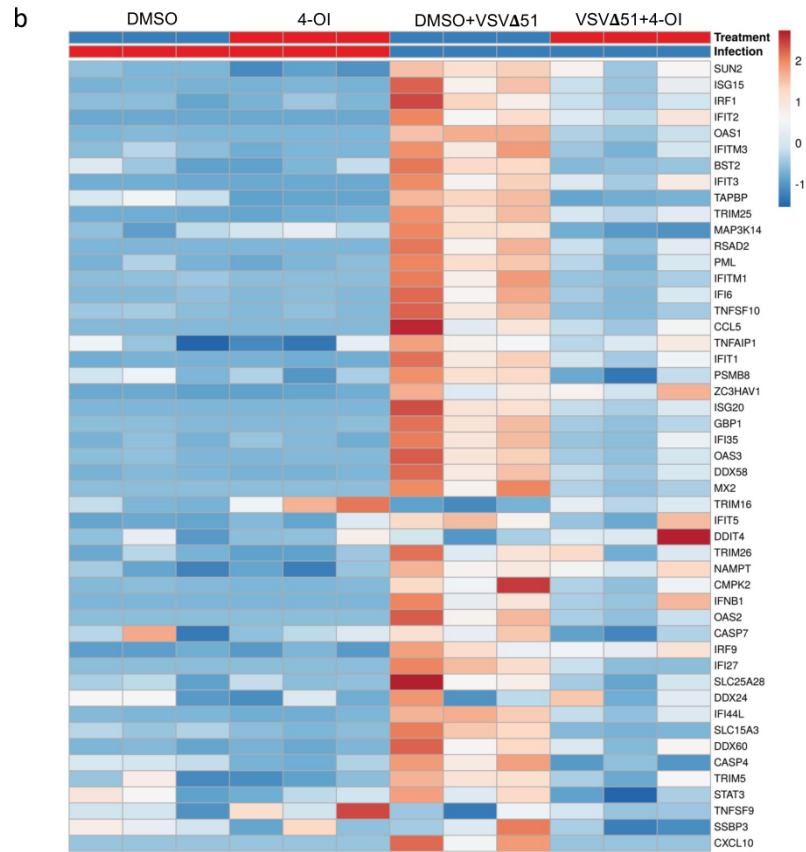

*Figure on previous page*

**Figure S7. Heatmap of differentially expressed antiviral and NRF2-regulated genes in 4-OI-stimulated NRF2 KO cancer cells**

**a-b** 786-O cells were pre-treated with 4-OI (75  $\mu$ M) for 24 hours and subsequently infected with VSV $\Delta$ 51 (MOI 0.01) for 17 hours. RNA was analyzed using RNA sequencing. Heat map showing the expression of differentially expressed NRF2-regulated genes (**a**) and interferon stimulated genes (ISGs) (**b**) across all experimental conditions. Data are from one experiment performed in triplicate.

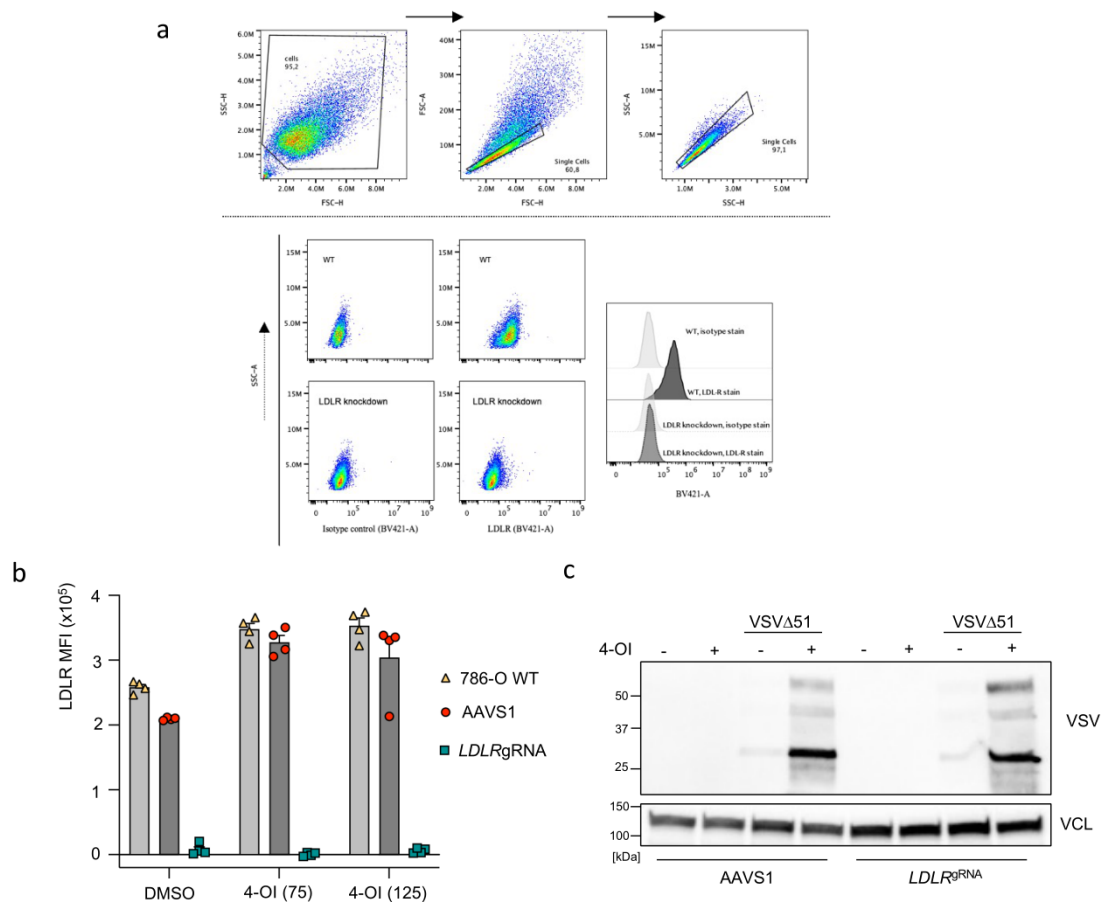

### Figure S8. 4-OI does not promote OV infectivity in cancer cells via the modulation of LDL Receptor Surface Levels

**a** Representative flow cytometry plots showing the gating strategy used to determine the LDLR expression. Total cells were selected using SSC-H/FSC-H gating, followed by FSC-A/FSC-H and SSC-A/SSC-H to select for single cells, which were used to measure the BV421 fluorescence upon staining with LDLR-BV421 antibody or the respective BV421-conjugated isotype control.

**b** 786-O cells were transiently KO for LDL Receptor (LDLR) (LDLR<sup>gRNA</sup>) using CRISPR/Cas9 gene editing, treated with a control gRNA sequence (AAVS1) or simply electroporated (786-O WT). Following CRISPR/Cas9 gene editing, cells were treated with 4-OI (75 or 125  $\mu$ M) for 24 hours and LDLR surface levels was assessed by flow cytometry.

**c** 786-O cells transiently KO for LDL Receptor (LDLR) (LDLR<sup>gRNA</sup>) using CRISPR/Cas9 gene editing were pre-treated with 4-OI (75  $\mu$ M) for 24 hours and subsequently infected with VSV $\Delta$ 51 (MOI 0.01) for 17 hours. Western blot was performed on cell lysates for VSV proteins. Vinculin (VCL) was used as a housekeeping control. Data are depicted as means  $\pm$  SEM from two experiments performed in duplicate in **a-b**. WB is representative of one experiment performed twice in **c**. Source data are provided as a Source Data file.

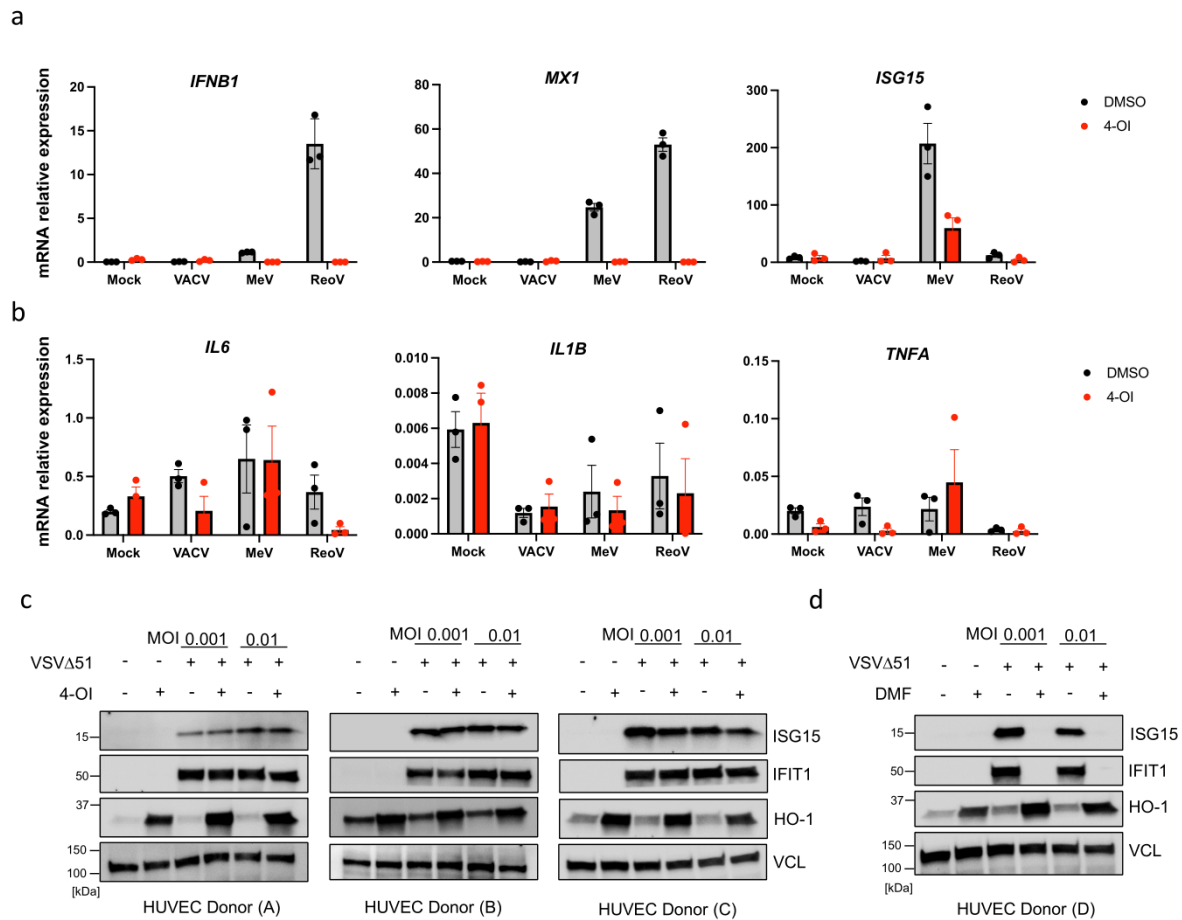

**Figure S9. Modulation of antiviral immune responses by 4-OI in tumoral and normal cells**

**a-b** PANC1 cells were pre-treated with 4-OI (125  $\mu$ M) for 24 hours and subsequently infected with Reovirus ( $10^6$  TCID<sub>50</sub>/ml), vaccinia virus (MOI 0.01) and Measles virus (MOI 0.1) for 48 hrs. Antiviral and inflammatory gene levels were determined by qPCR.

**c-d** Primary HUVECs from four different donors (Donor A to Donor D) were pre-treated with 4-OI (125  $\mu$ M) (c) or DMF (100  $\mu$ M) (d) for 24 hours and subsequently infected with VSV $\Delta$ 51 (MOI 0.001 or MOI 0.01) for 17 hours. Antiviral immune responses were assessed by immunoblotting of IFIT1 and ISG15. HO-1 served as a positive control of NRF2 induction and VCL was using as an invariant loading control. Data are depicted as means  $\pm$  SEM from one experiment performed in triplicates in **a-b**. Vertical stacks of bands are not derived from the same membrane in **c** and **d**. Source data are provided as a Source Data file.

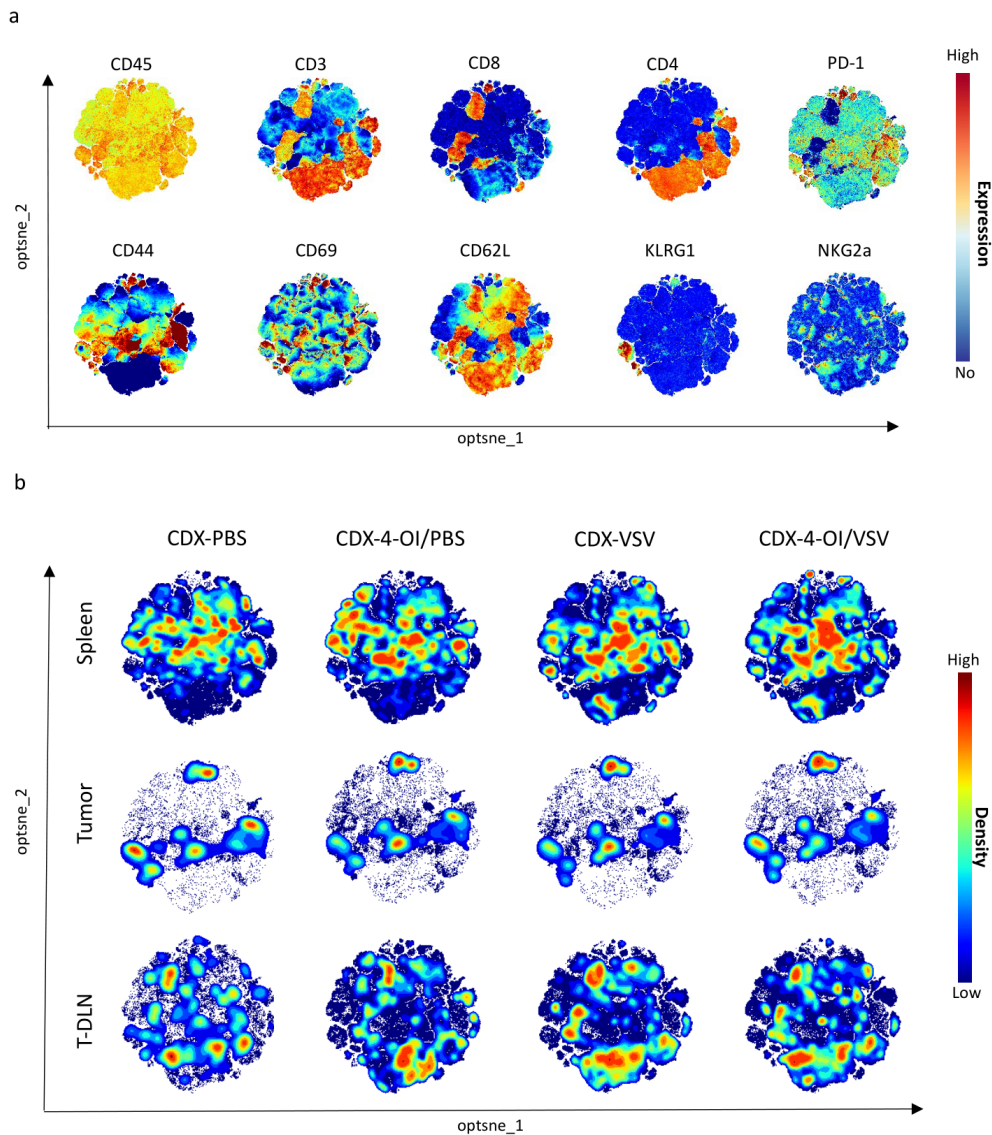

**Figure S10. 4-OI and/or VSVΔ51 does not affect the T-cell landscape within the tumor and lymphoid organs**

Flow cytometry data of single cell suspensions isolated from tumor, spleen or tumor-draining lymph node (T-DLN) isolated five days after the last VSVΔ51 injection. Data was analyzed using OMIQ software.

**a** Expression intensity profile of T-cell markers on clustered live, CD45+ gated samples of all treatment groups and organs (n=57) to distinguish regional expression of single T-cell markers in clusters. Relative expression is indicated by color where red indicates high expression and blue represents no expression within the cluster.

**b** OptSNE cluster plots of live, CD45+ gated samples displayed per organ and treatment group (n=3 mice in CDX-PBS group; n=5 mice in CDX-4-OI/PBS group, n=6 mice in CDX-VSV, and n=6 mice in CDX-4-OI/VSV groups). Cell density is indicated by color where red indicates high density and blue indicates low density within the cluster. 3 individual samples were lost during acquisition: 1 spleen sample in CDX-4-OI/VSV group (n=5), 1 tumor sample in CDX/VSV group (n=5), and 1 T-DLN sample in CDX/VSV group (n=5).

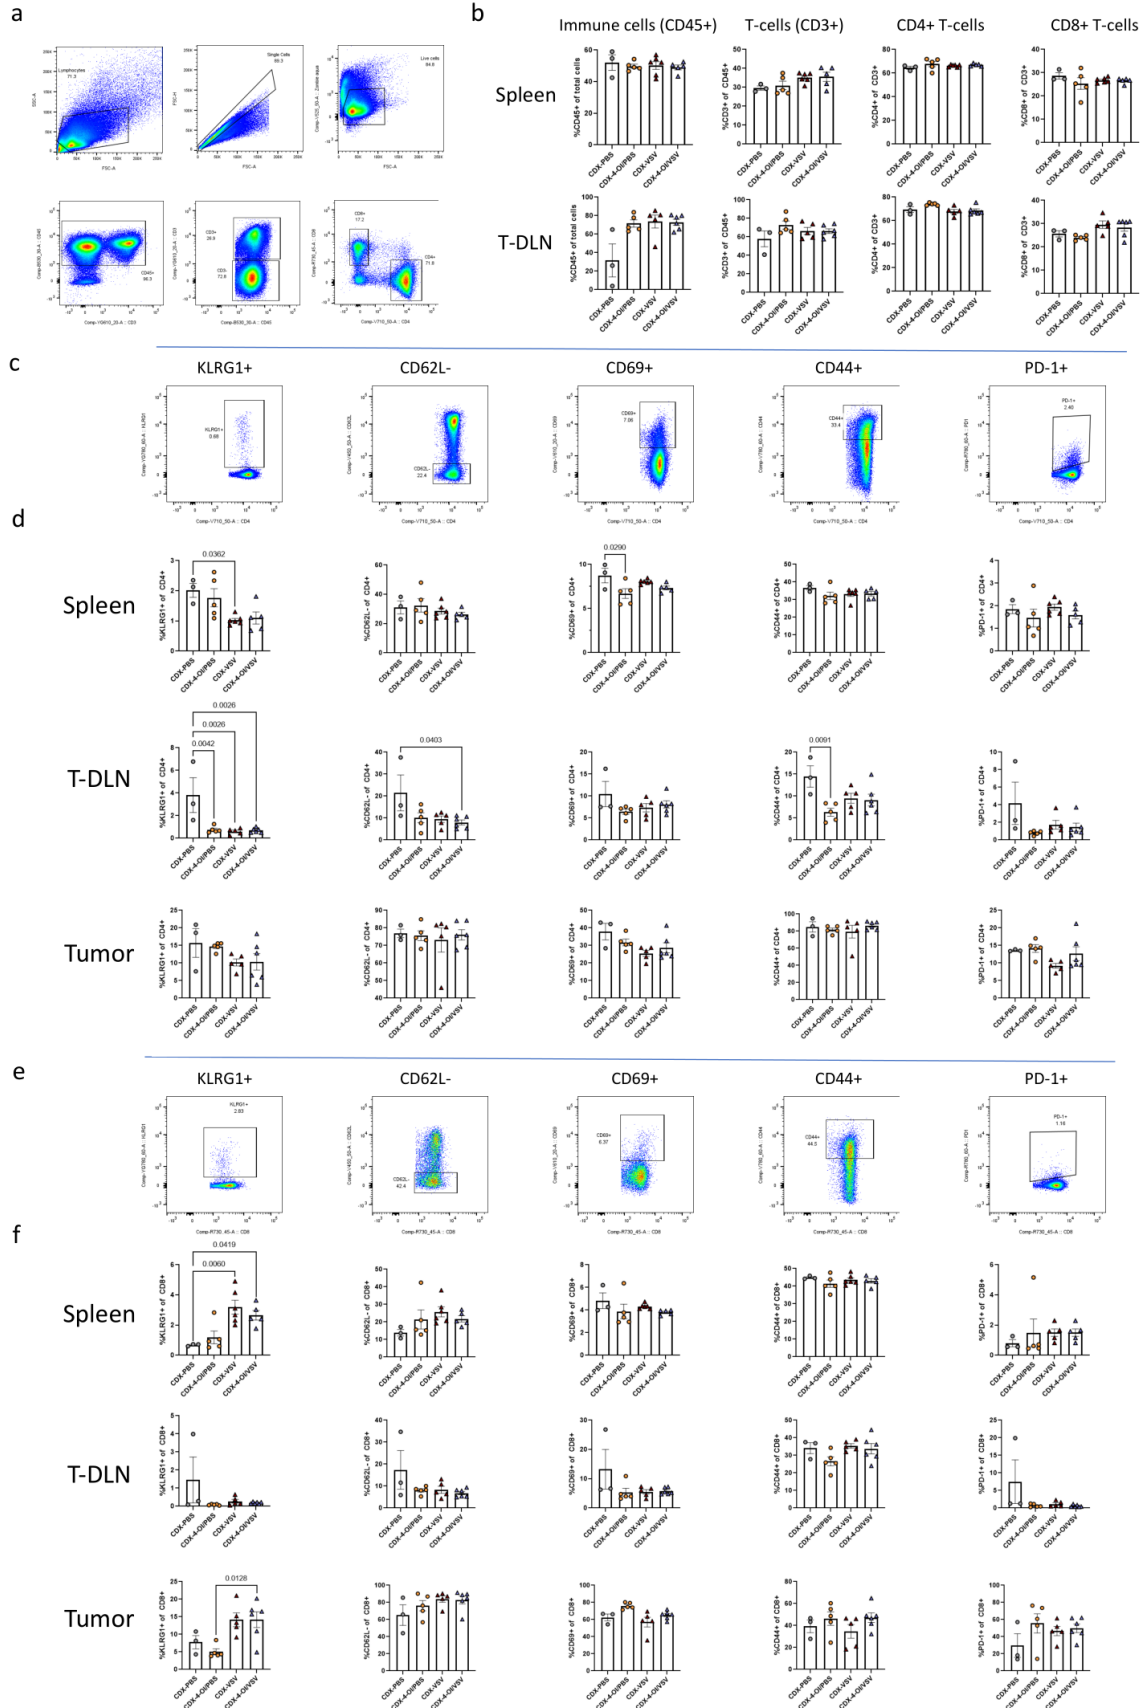

*Figure on previous page*

**Figure S11. 4-OI and/or VSVΔ51 do not affect T-cell density and phenotype in tumor and lymphoid organs**

Flow cytometry analysis of single cell suspensions isolated from tumor, spleen or tumor-draining lymph node (T-DLN) five days after the last VSVΔ51 injection. Data was analyzed using FlowJo software.

**a** Representative gating strategy for T-cell populations showed for spleen starting from total cells.

**b** Mean percentage of indicated T-cell population compared between treatment groups (n=3-6 animals per group). Each dot represents one mouse. n=3 mice in CDX-PBS group; n=5 mice in CDX-4-OI/PBS group, n=6 mice in CDX-VSV, and n=6 mice in CDX-4-OI/VSV groups. 3 individual samples were lost during acquisition: 1 spleen sample in CDX-4-OI/VSV group (n=5), 1 tumor sample in CDX/VSV group (n=5), and 1 T-DLN sample in CDX/VSV group (n=5).

**c** Representative gating strategy for activation markers on CD4<sup>+</sup> T-cells showed for spleen.

**d** Mean percentage of CD4<sup>+</sup> T-cells expressing different activation markers in spleen, T-DLN and tumor, compared between treatment groups (n=3-6 animals per group).

**e** Representative gating strategy for activation markers on CD8<sup>+</sup> T-cells showed for spleen.

**f** Mean percentage of CD8<sup>+</sup> T-cells expressing different activation markers in spleen, T-DLN and tumor, compared between treatment groups (n=3-6 animals per group).

P-value is calculated with one-way ANOVA followed by Šidák's multiple comparisons test. No difference found, unless P-value indicated. Source data are provided as a Source Data file.

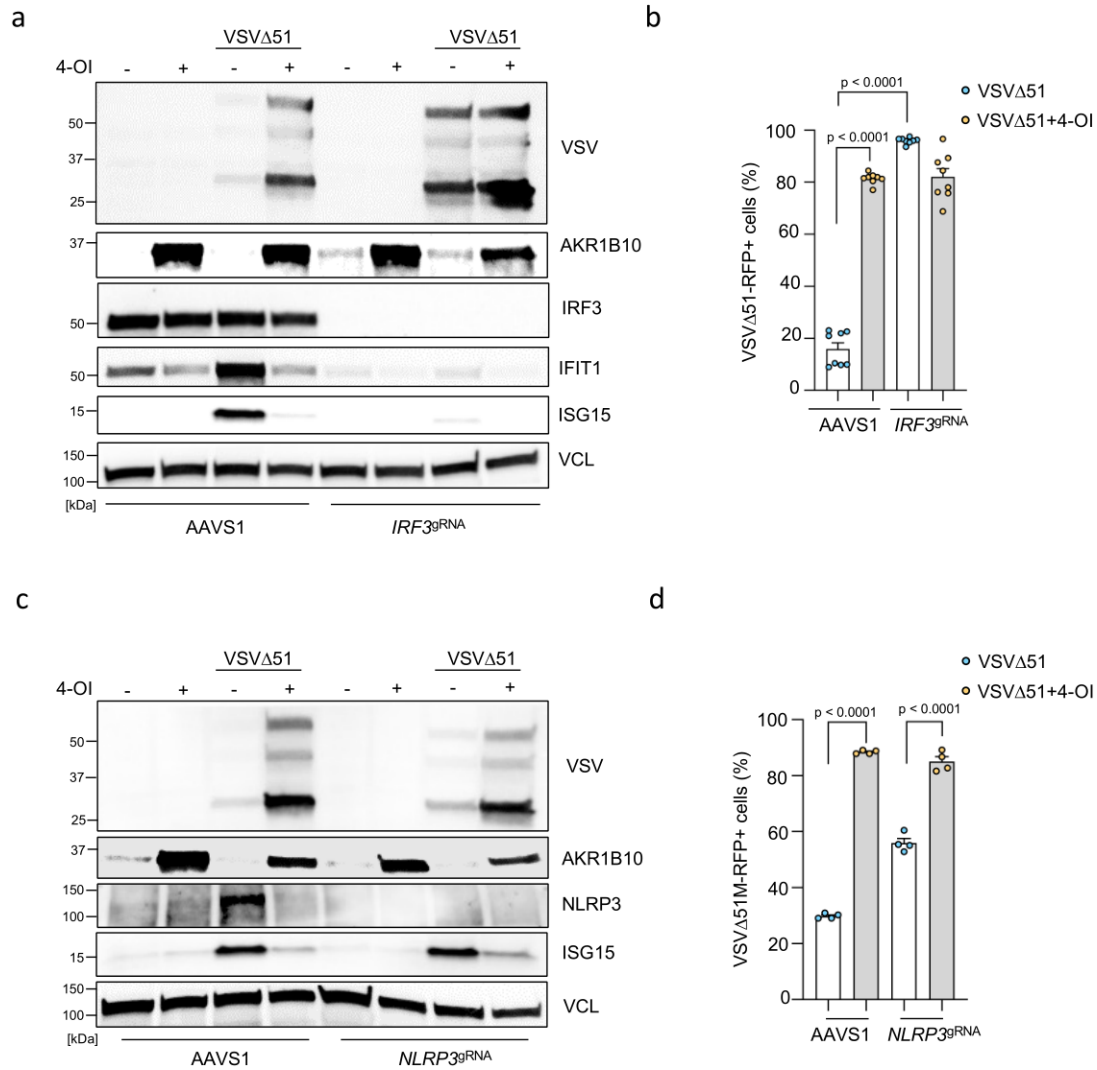

**Figure S12. 4-OI does not promote OV infectivity in cancer cells via the alkylation of NLRP3**

**a-b** 786-O cells transiently KO for IRF3 (*IRF3<sup>gRNA</sup>*) using CRISPR/Cas9 gene editing were pre-treated with 4-OI (75  $\mu$ M) for 24 hours and subsequently infected with VSVΔ51 (MOI 0.01) for 17 hours. Western blot was performed on cell lysates for VSV proteins and antiviral markers (a). Vinculin (VCL) was used as a housekeeping control. The number of infected RFP+ cells was quantified by flow cytometry (b).

**c-d** 786-O cells transiently KO for NLRP3 (*NLRP3<sup>gRNA</sup>*) using CRISPR/Cas9 gene editing were pre-treated with 4-OI (75  $\mu$ M) for 24 hours and subsequently infected with VSVΔ51 (MOI 0.01) for 17 hours. Western blot was performed on cell lysates for VSV proteins and antiviral markers (c). Vinculin (VCL) was used as a housekeeping control. The number of infected RFP+ cells was quantified by flow cytometry (d).

Data are depicted as means  $\pm$  SEM from two experiments performed in quadruplicate in **a** and duplicate in **b**. WB is representative of one experiment performed twice in **a** and **b**. Statistics indicate significance by one-way ANOVA in **b** and **d**. Vertical stacks of bands are not derived from the same membrane in **a** and **c**. Source data are provided as a Source Data file.

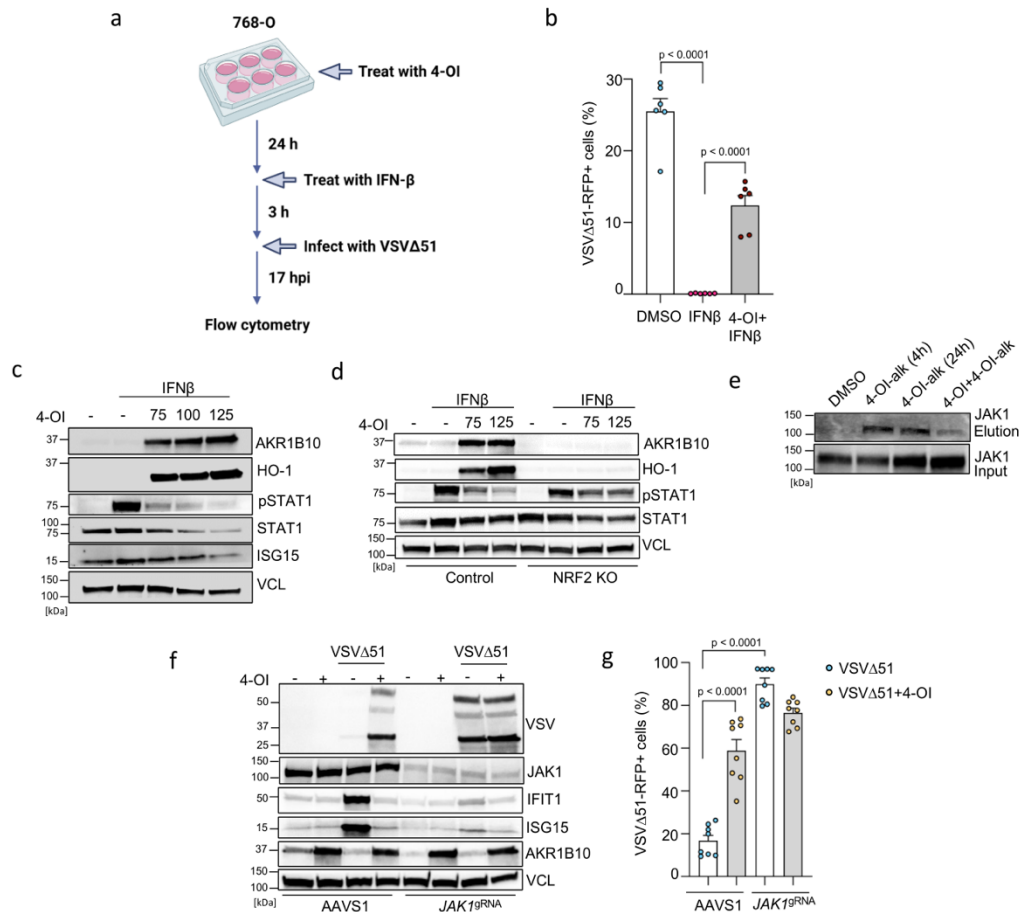

**Figure S13. 4-OI enhances VSV $\Delta$ 51 infectivity in cancer cell via the impairment of type IFN signaling through JAK1 direct modification**

**a-b** 768-O cells were treated with 4-OI (75  $\mu$ M) for 24 hours prior to IFN $\beta$  stimulation (200 U/mL) for 3 hours. Cells were subsequently infected with VSV $\Delta$ 51 (MOI 0.01) for 17 hours (a) and infectivity was assessed by flow cytometry of infected RFP+ cells.

**c-d** 768-O cells (c) or control and NRF2 KO 768-O cells (d) were treated with 4-OI at the indicated concentrations for 24 hours prior to IFN $\beta$  stimulation (250 U/mL) for 30 min. Cell lysates were immunoblotted for antiviral proteins and NRF2-related markers. Vinculin (VCL) was used as the invariant housekeeping control.

**e** 768-O cells were treated with 75  $\mu$ M of alkynated 4-OI (4-OI-alk) for 4 or 24 hours in the presence or not of 4-OI (75  $\mu$ M). The samples before and after enrichment were analyzed by anti-JAK1 immunoblotting.

**f-g** 768-O cells transiently KO for JAK1 (*JAK1*<sup>gRNA</sup>) using CRISPR/Cas9 gene editing were pre-treated with 4-OI (75  $\mu$ M) for 24 hours and subsequently infected with VSV $\Delta$ 51 (MOI 0.01) for 17 hours. Western blot was performed on cell lysates for VSV proteins and antiviral markers. Vinculin (VCL) was used as a housekeeping control (f). The number of infected RFP+ cells was quantified by flow cytometry (g).

Data are depicted as means  $\pm$  SEM from two experiments performed in triplicate in **b**. WB is representative of one experiment performed twice in **c-f**. Data are depicted as means  $\pm$  SEM from two experiments performed in quadruplicate in **g**. Statistics indicate significance by one-way ANOVA in **b** and **g**. Vertical stacks of bands are not derived from the same membrane in **c**, **d** and **f**. Source data are provided as a Source Data file.

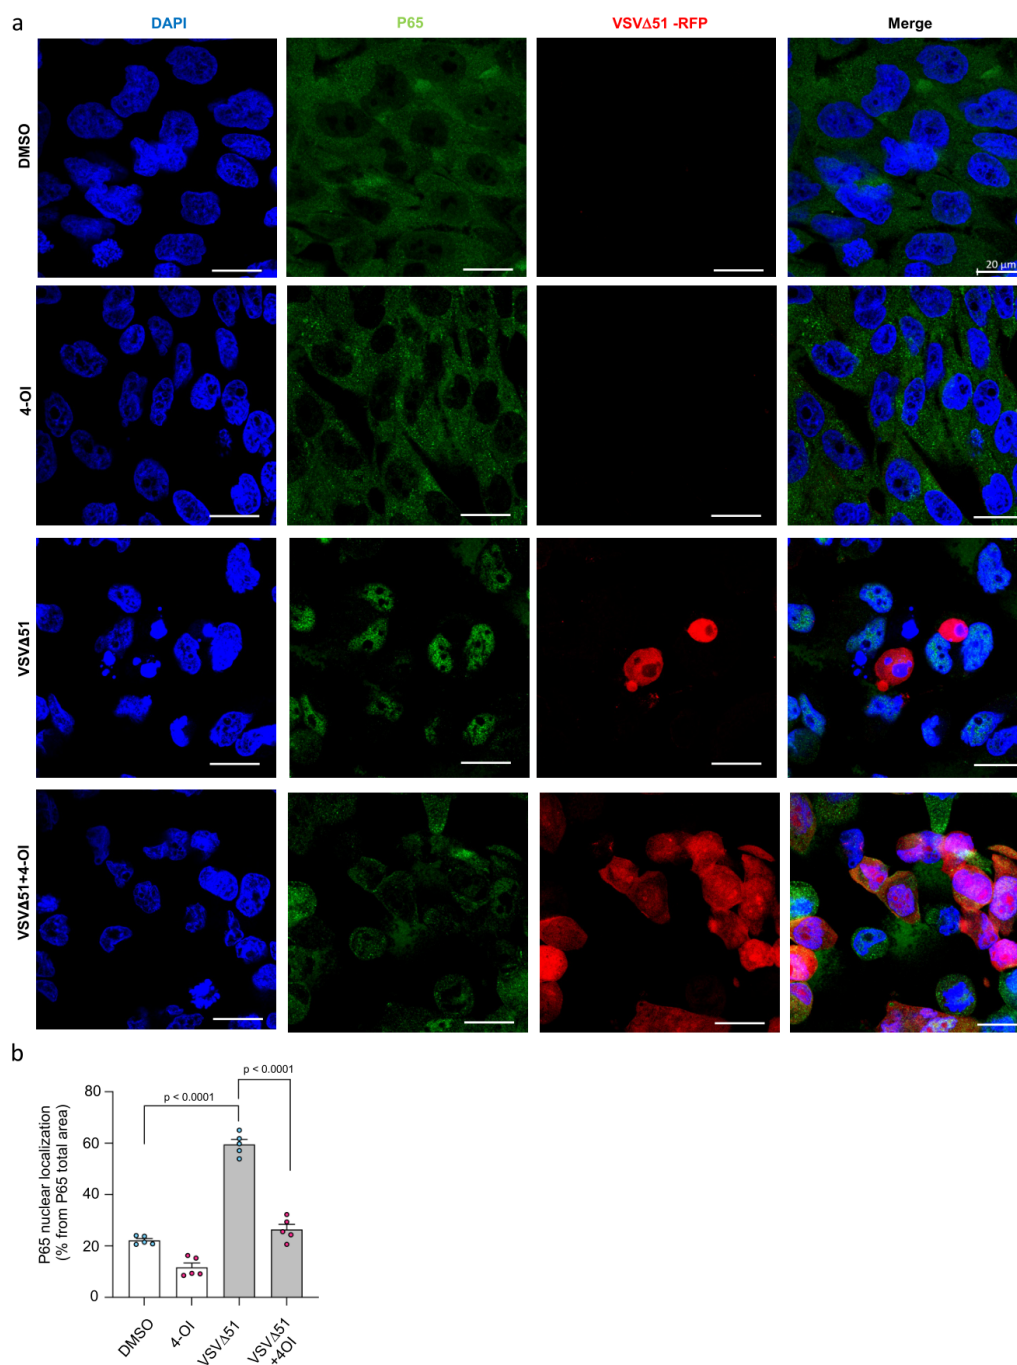

**Figure S14. 4-OI prevents the nuclear translocation of RELA upon VSVΔ51 infection**

**a** 786-O cells were pre-treated with 4-OI (75  $\mu$ M) for 24 hours and subsequently infected with VSVΔ51 (MOI 0.01) for 17 hours. NF- $\kappa$ B p65 (RELA) nuclear translocation was assessed by fluorescence microscopy. Nuclei are stained with DAPI. Scale bars, 20  $\mu$ m.

**b** p65 area within nuclear fraction was quantified using Image J software.

The data are representative of one experiment which has been repeated twice in **a**. Data are depicted as means  $\pm$  SEM from one experiment performed in five replicates in **b**. Statistics indicate significance by one-way ANOVA in **b**. Source data are provided as a Source Data file.

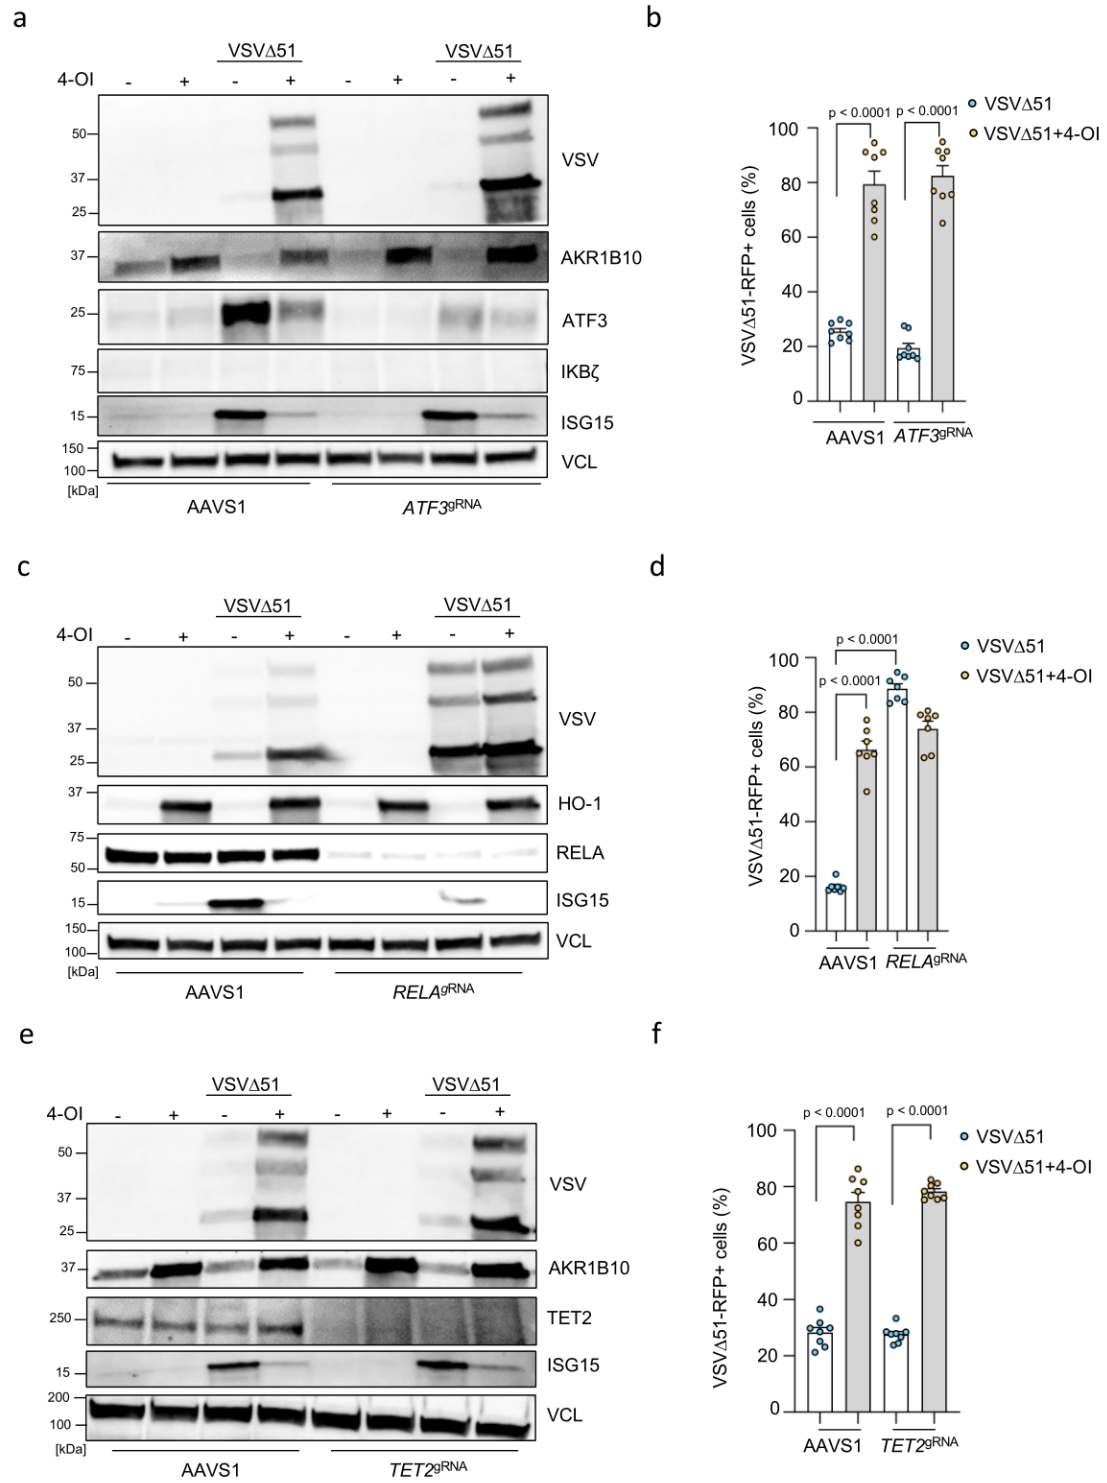

*Figure on previous page*

**Figure S15. 4-OI does not promote OV infectivity in cancer cells via the alkylation of TET2 or the modulation of the ATF3-IKb  $\zeta$  axis**

**a-b** 786-O cells transiently KO for ATF3 (*ATF3<sup>gRNA</sup>*) using CRISPR/Cas9 gene editing were pre-treated with 4-OI (75  $\mu$ M) for 24 hours and subsequently infected with VSV $\Delta$ 51 (MOI 0.01) for 17 hours. Western blot was performed on cell lysates for VSV proteins and antiviral markers (a). Vinculin (VCL) was used as a housekeeping control. The number of infected RFP+ cells was quantified by flow cytometry (b).

**c-d** 786-O cells transiently KO for p65/RELA (*RELA<sup>gRNA</sup>*) using CRISPR/Cas9 gene editing were pre-treated with 4-OI (75  $\mu$ M) for 24 hours and subsequently infected with VSV $\Delta$ 51 (MOI 0.01) for 17 hours. Western blot was performed on cell lysates for VSV proteins and antiviral markers (c). Vinculin (VCL) was used as a housekeeping control. The number of infected RFP+ cells was quantified by flow cytometry (d).

**e-f** 786-O cells transiently KO for TET2 (*TET2<sup>gRNA</sup>*) using CRISPR/Cas9 gene editing were pre-treated with 4-OI (75  $\mu$ M) for 24 hours and subsequently infected with VSV $\Delta$ 51 (MOI 0.01) for 17 hours. Western blot was performed on cell lysates for VSV proteins and antiviral markers (e). Vinculin (VCL) was used as a housekeeping control. The number of infected RFP+ cells was quantified by flow cytometry (f).

Data are depicted as means  $\pm$  SEM from two experiments performed in quadruplicate in **b**, from two experiments in triplicate and quadruplicate in **d**, from two experiments in quadruplicate in **f**. WB is representative of one experiment performed twice in **a**, **c** and **e**. Statistics indicate significance by one-way ANOVA in **b**, **d** and **f**. Vertical stacks of bands are not derived from the same membrane in **a**, **c** and **e**. Source data are provided as a Source Data file.

a

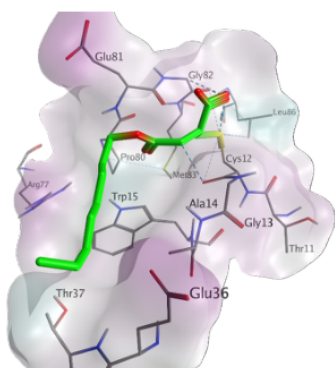

b

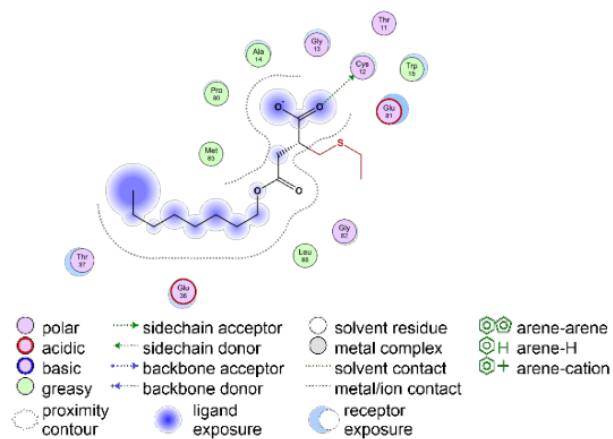

c

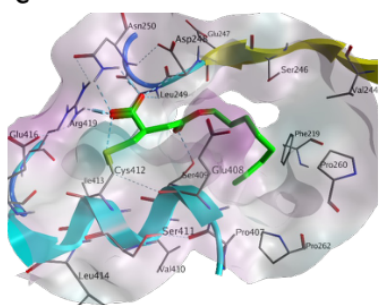

d

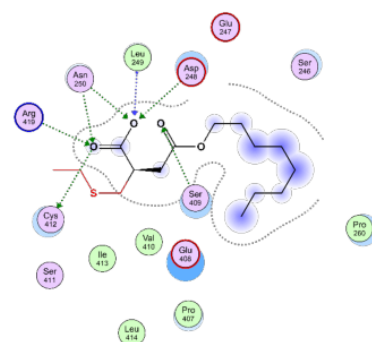

e

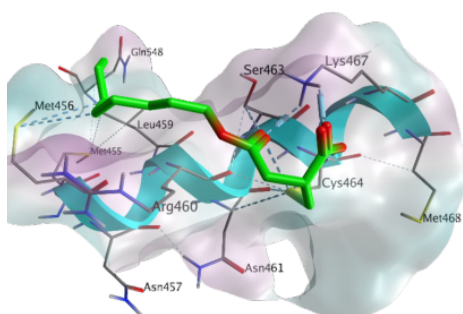

f

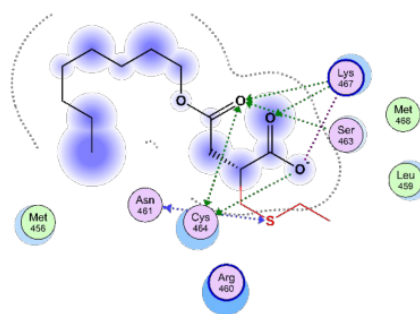

g

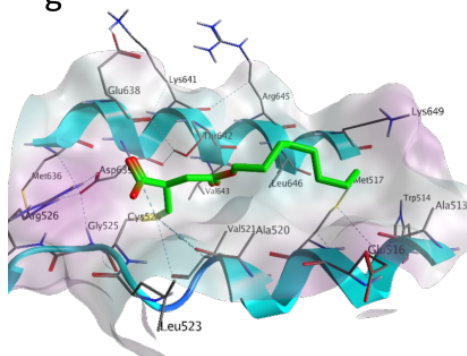

h

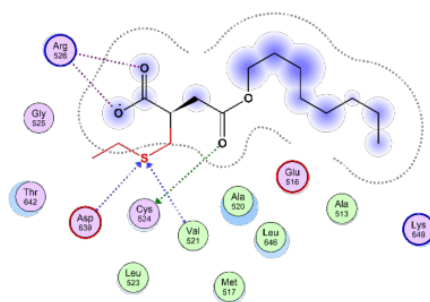

i

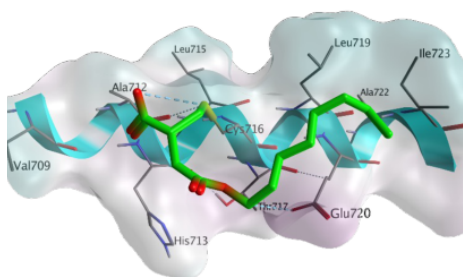

j

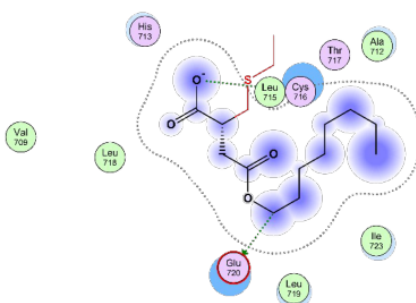

*Figure on previous page*

**Figure S16. Potential covalent binding modes of 4-OI to cysteine residues in human IKK $\beta$**   
**a-j** Potential covalent binding modes of 4-OI (green) targeting Cys12 (a), Cys412 (c), Cys464 (e), Cys524 (g) and Cys716 (i) in the human IKK $\beta$ . The corresponding 2D ligand–protein interactions are displayed in (b), (d), (f), (g) and (j), respectively. Lipophilicity protein surface: lipophilic (cyan), hydrophilic (violet), neutral (white),  $\alpha$ -helices (cyan),  $\beta$ -sheets (yellow), loops (cyan).

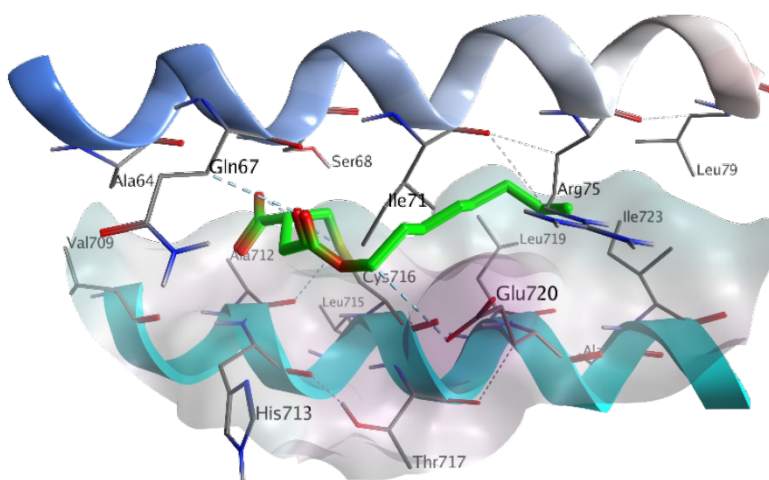

**Figure S17. Modelling of 4-OI binding to Cys716 and interaction with NEMO**

Overlay of Cys716-bound 4-OI (green) and the  $\alpha$ -helix of NEMO (blue) showing steric interactions of the 4-OI octyl moiety with Gln67, Ser68, Ile71 and Arg75 of NEMO. Lipophilicity protein surface: lipophilic (cyan), hydrophilic (violet), neutral (white),  $\alpha$ -helices (cyan),  $\beta$ -sheets (yellow), loops (cyan).

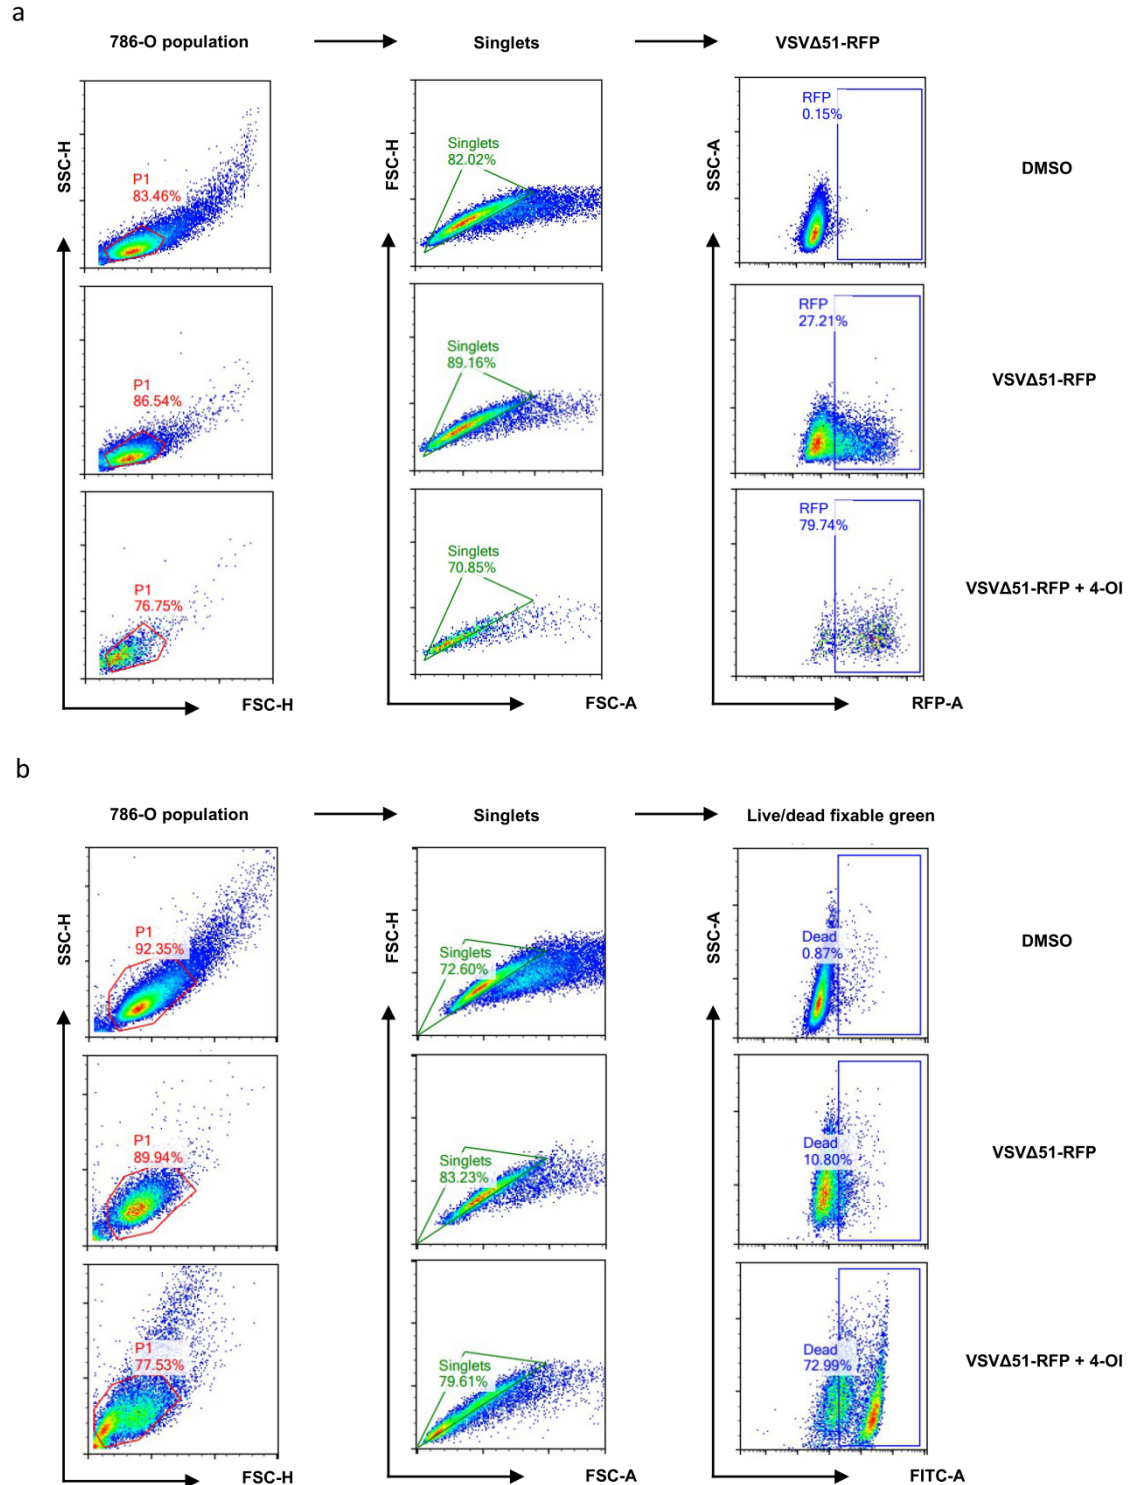

**Figure S18. Gating strategies for flow cytometry**

**a** Gating strategy for flow cytometric assessment of viral infection using RFP-expressing virus strain. Fluorescent flow cytometry data scale (RFP-A) is shown in logarithmic flavor ranging from  $10^1$ - $10^7$

**b** Gating strategy for flow cytometric assessment of cellular viability. Fluorescent flow cytometry data scale (FITC-A) is shown in logarithmic flavor ranging from  $10^3$ - $10^9$

**Figure S19. Unprocessed immunoblots.**

**Fig. 4b**

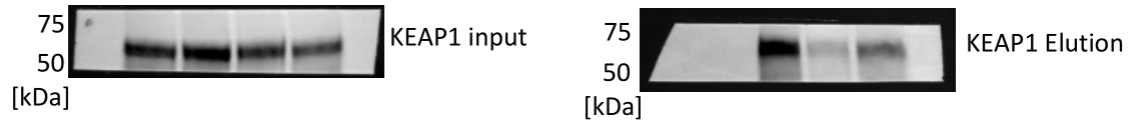

**Fig. 4d**

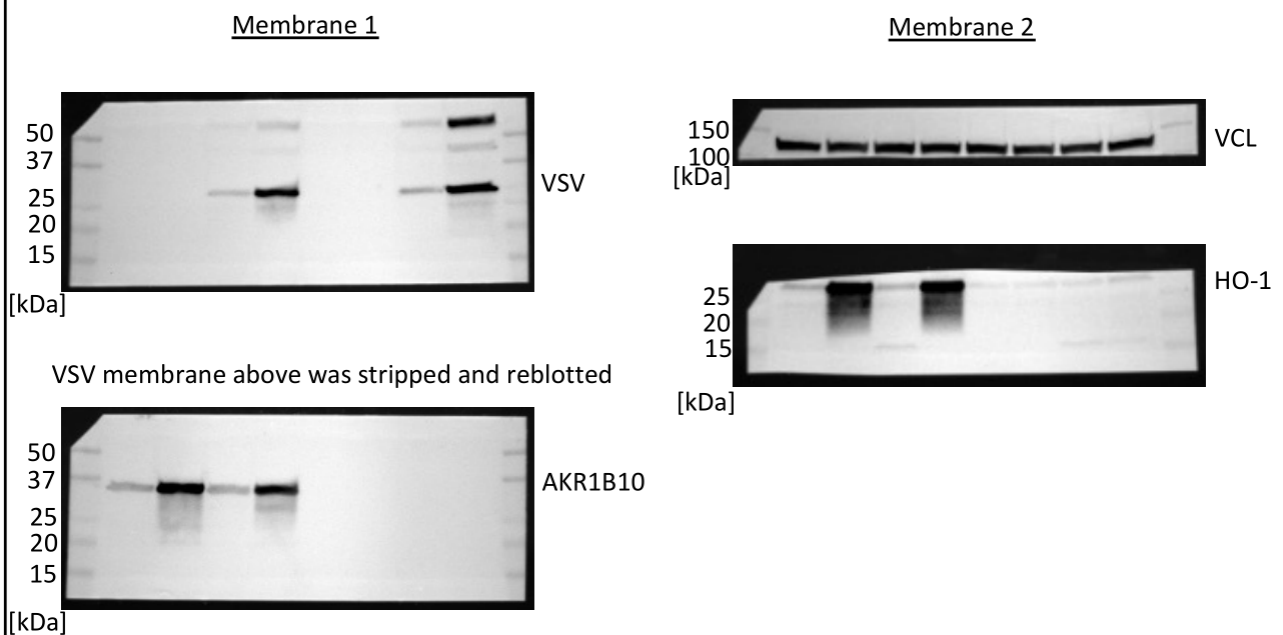

**Fig. 4h**

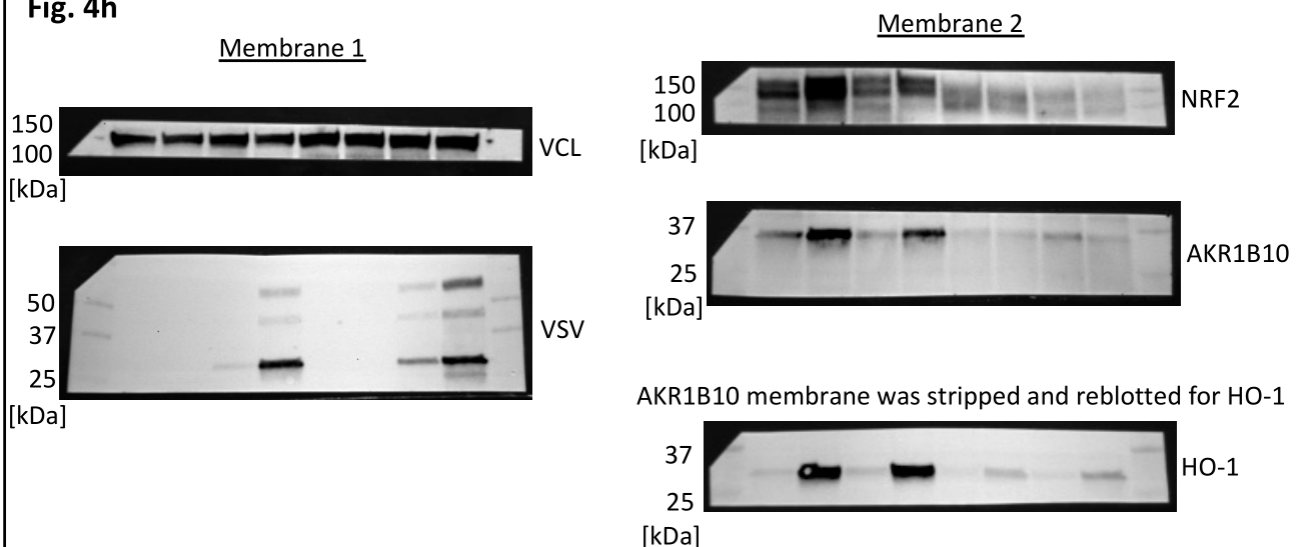

**Fig. 4i**

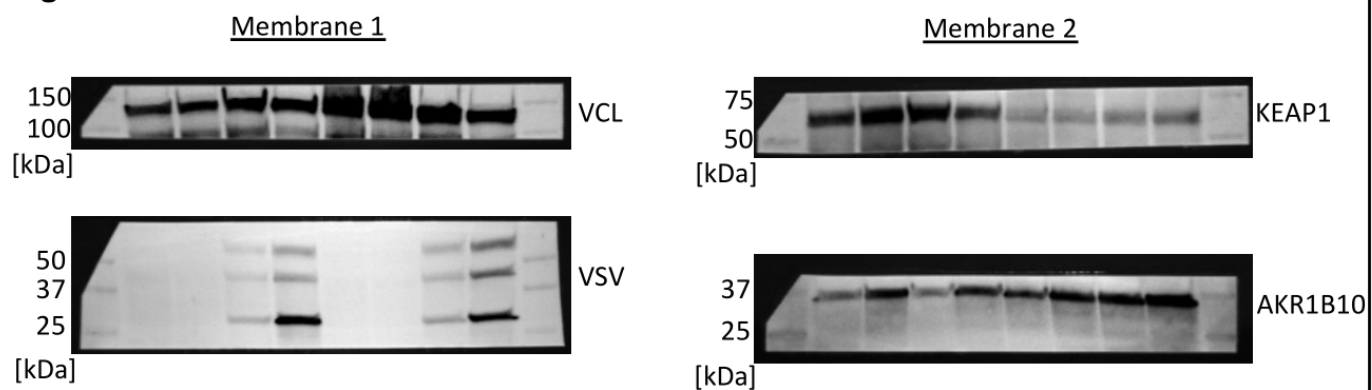

**Fig. 5e**

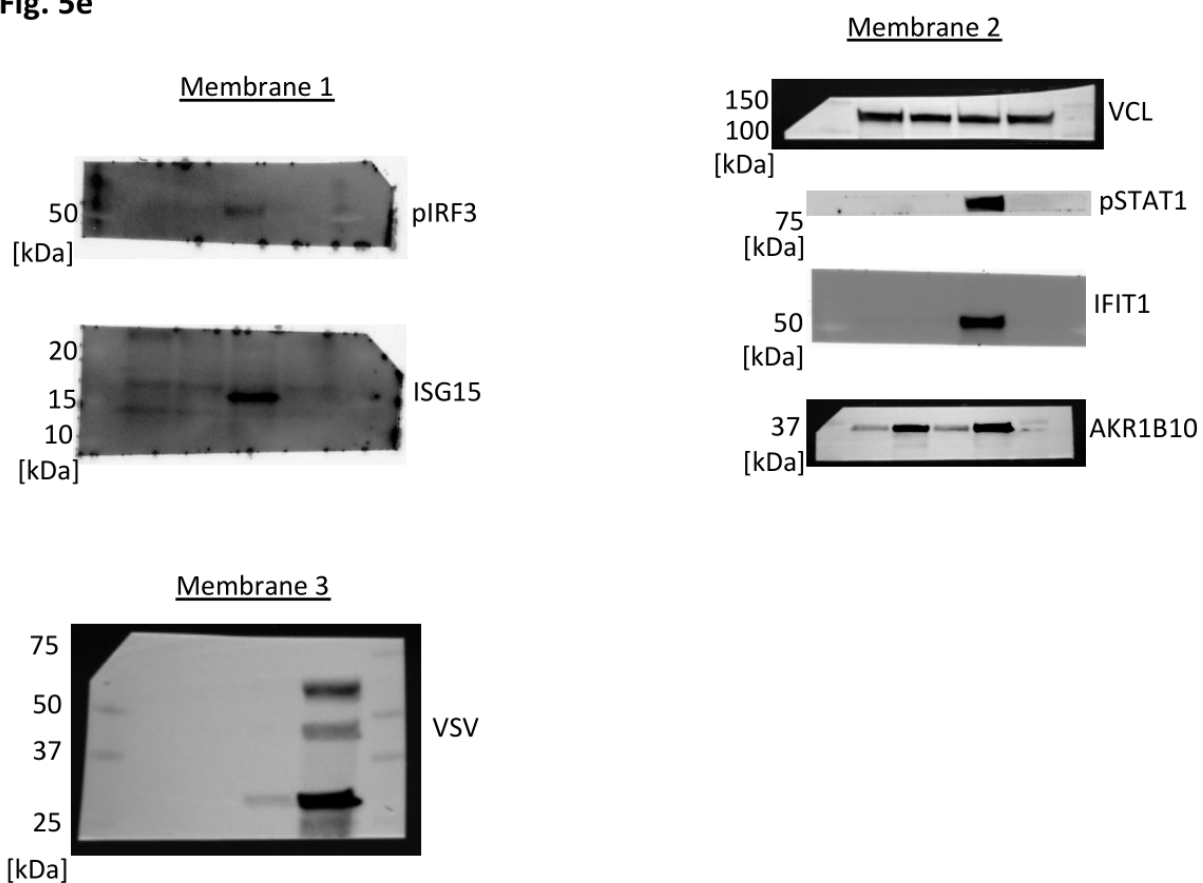

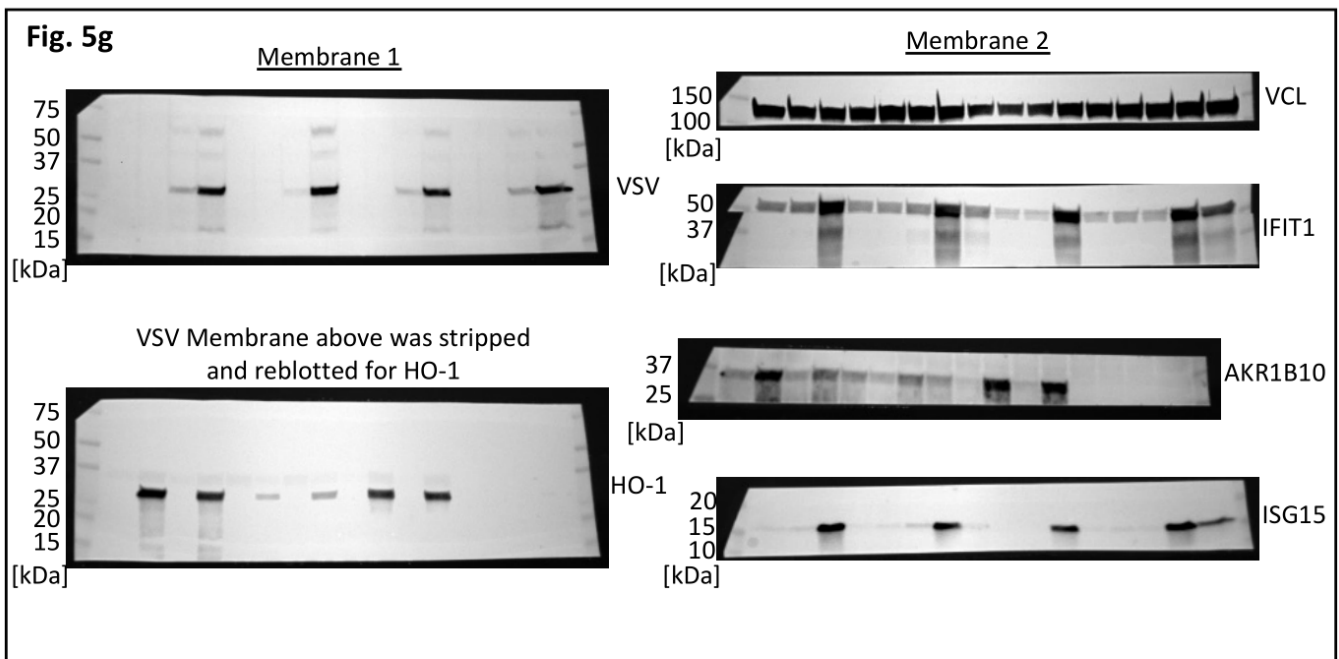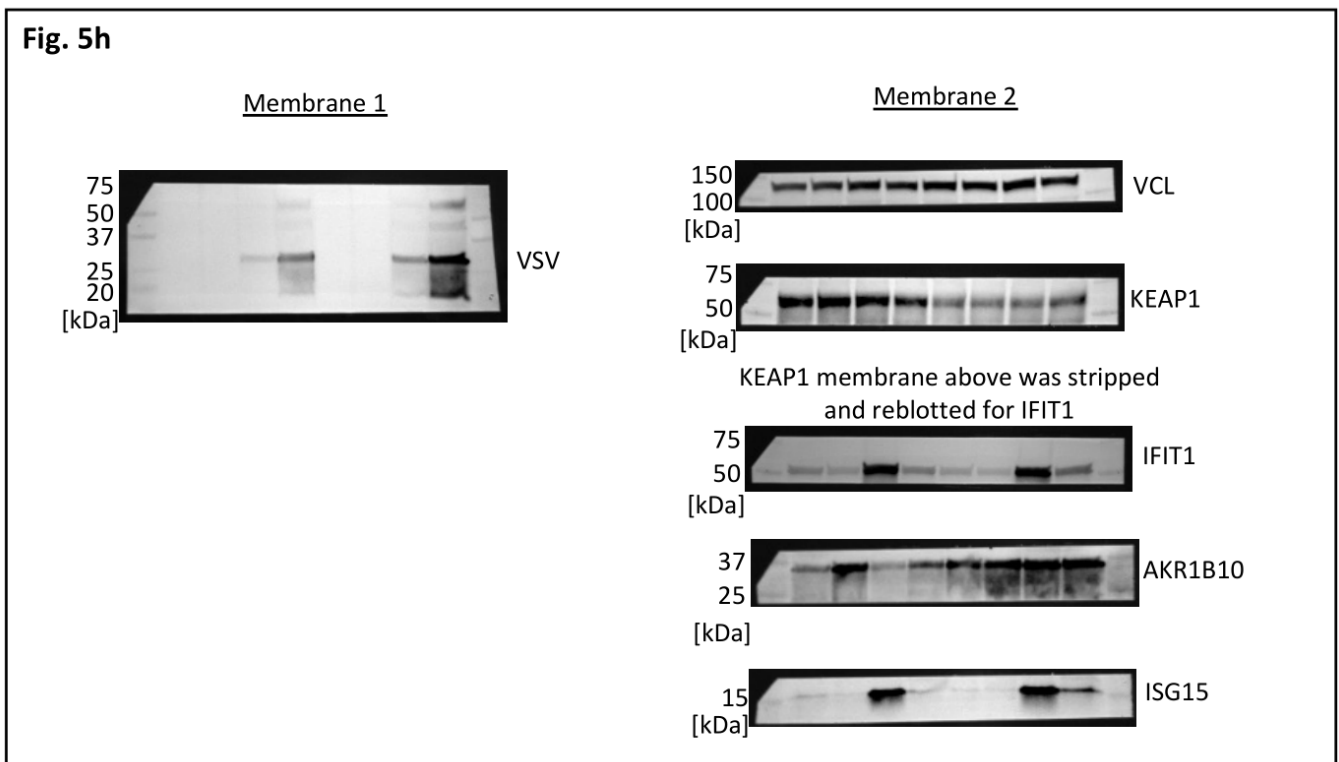

**Fig. 5j**

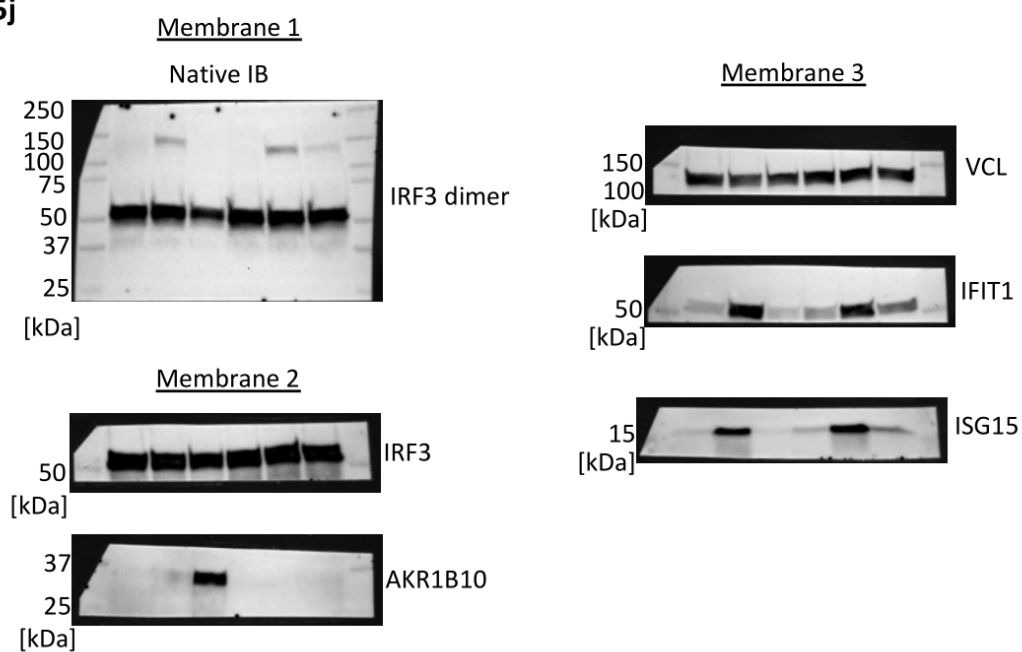

**Fig. 7a**

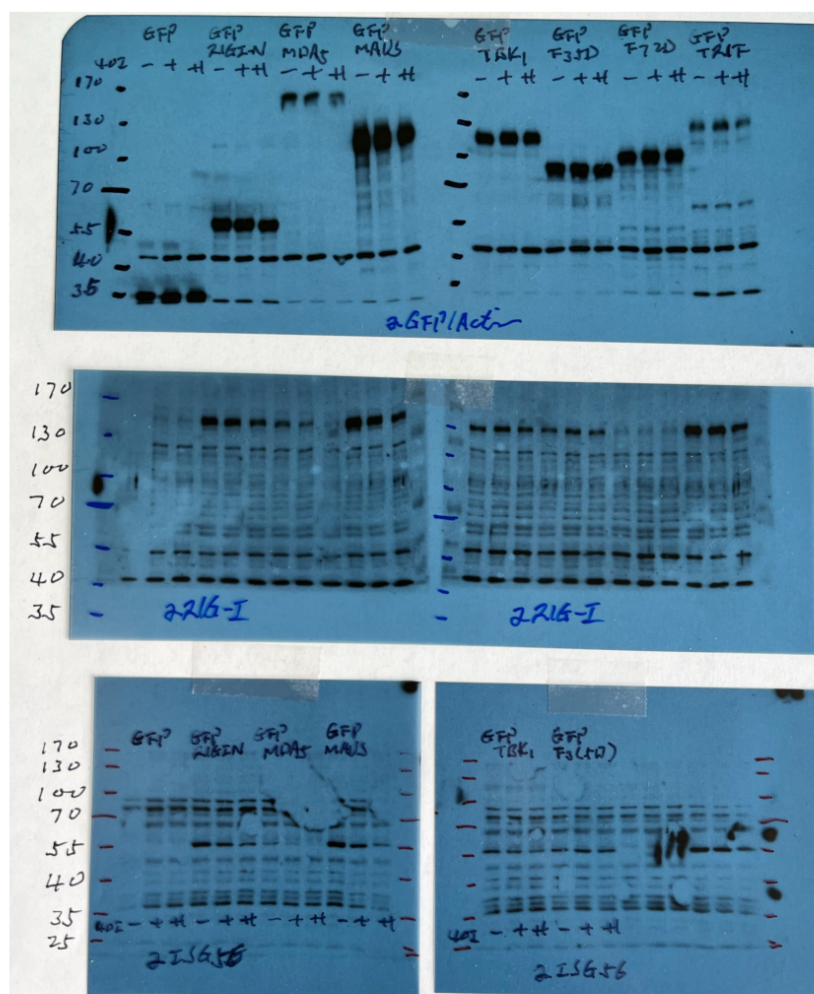

Fig. 7d

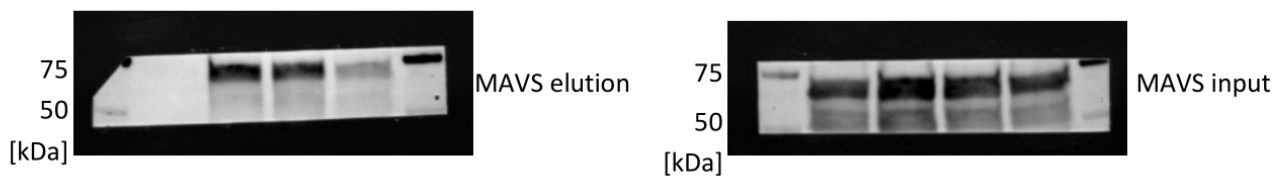

Fig. 7e

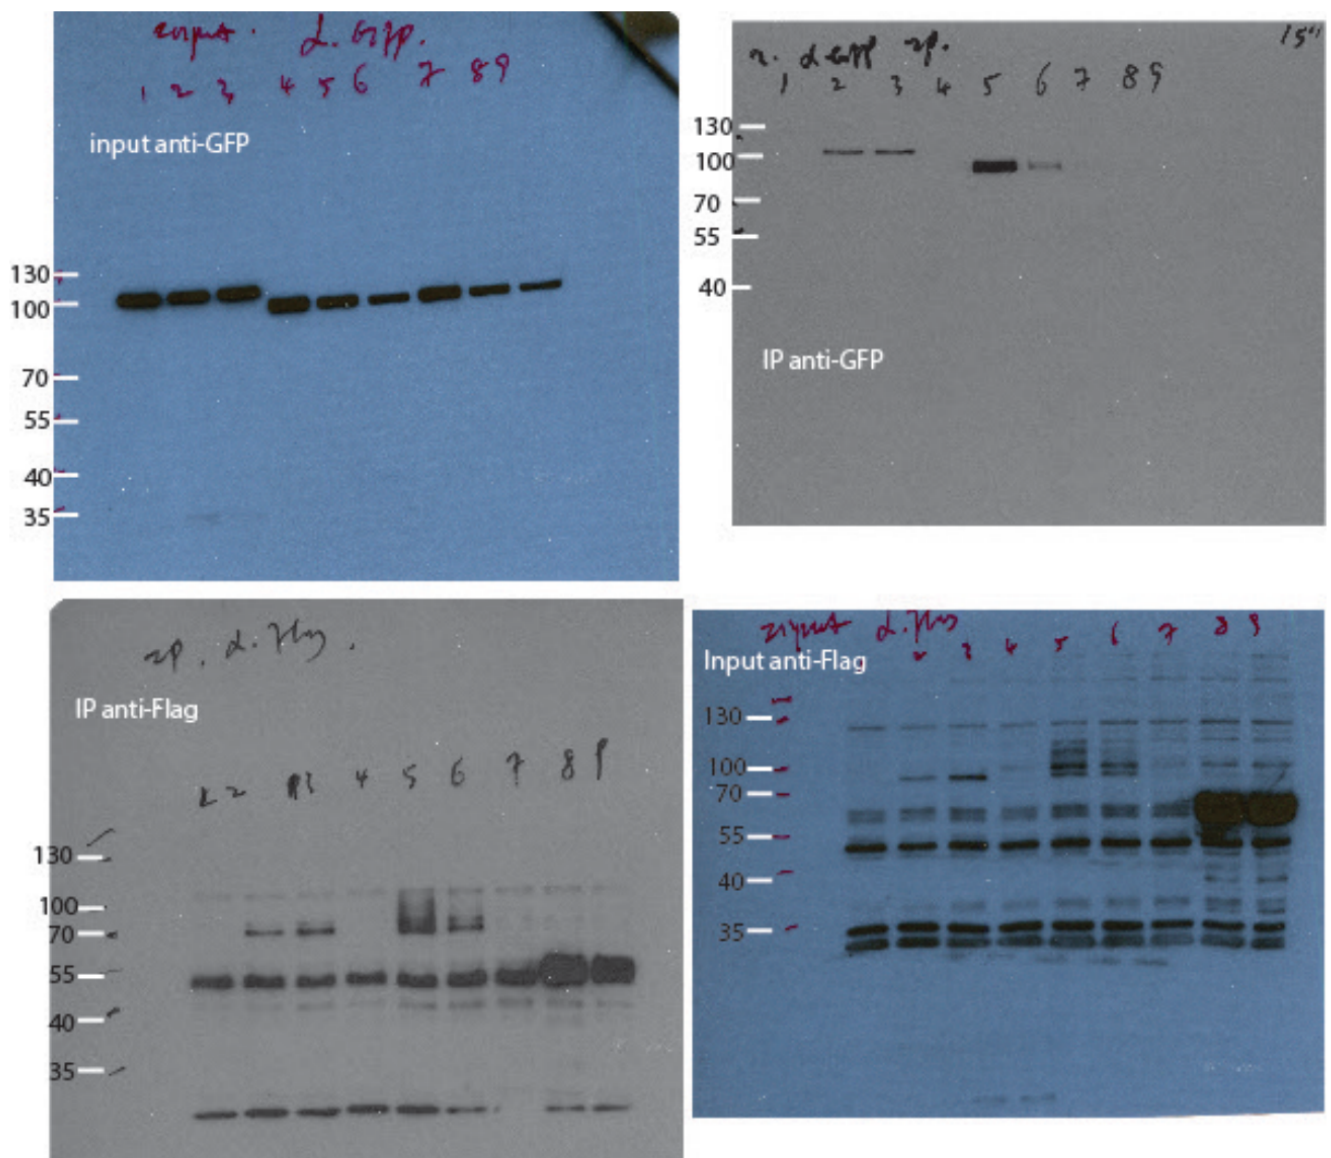

**Fig. 7f**

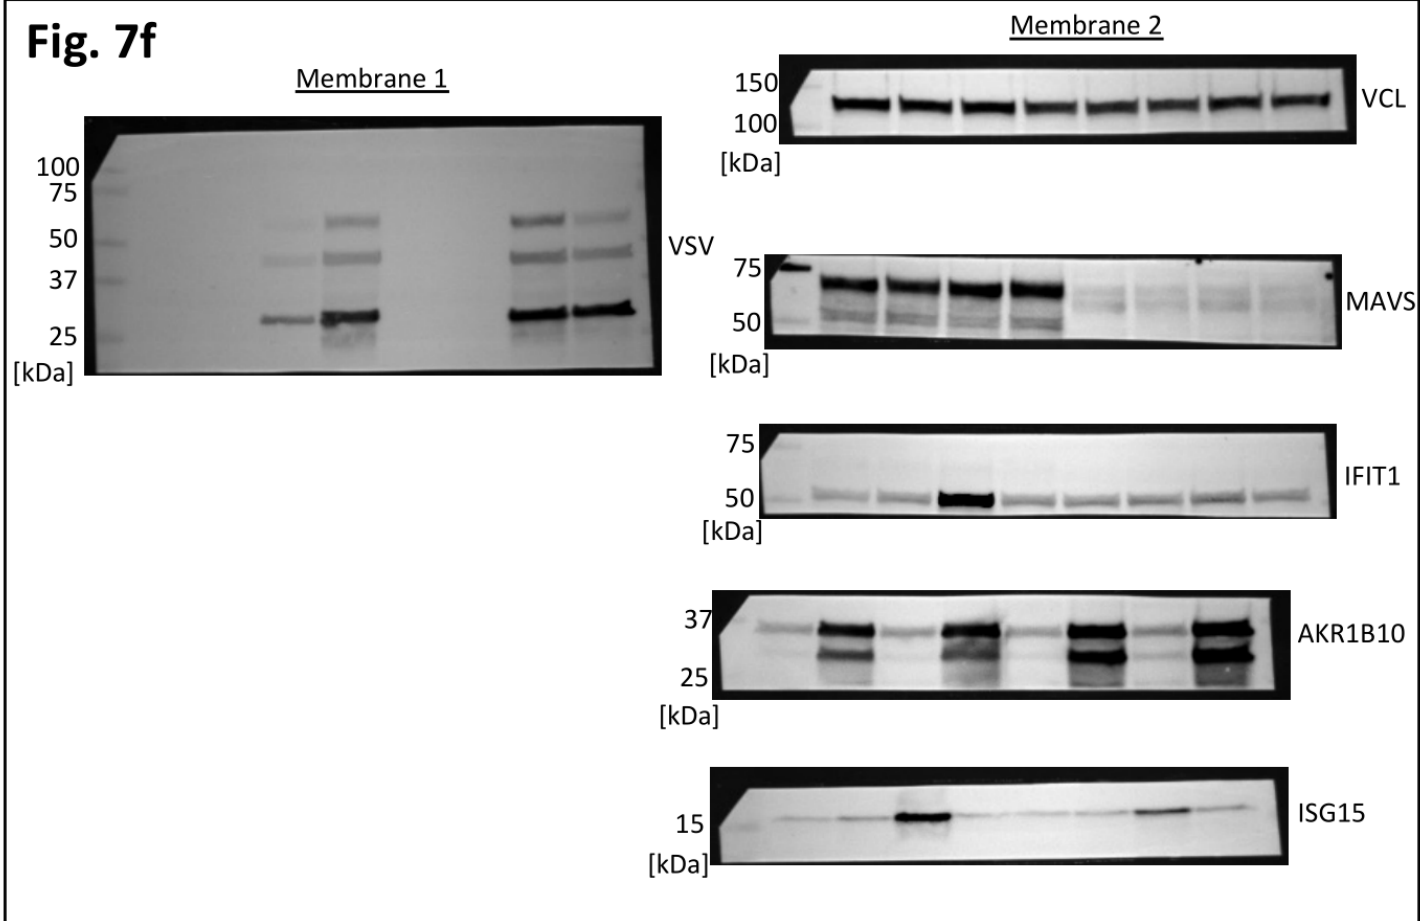

**Fig. 7h**

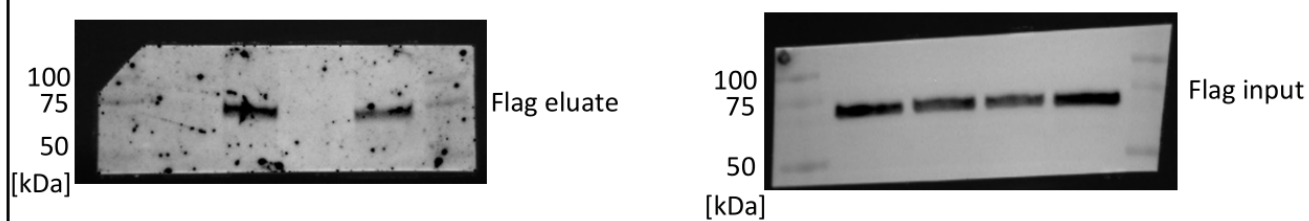

Fig. 7j

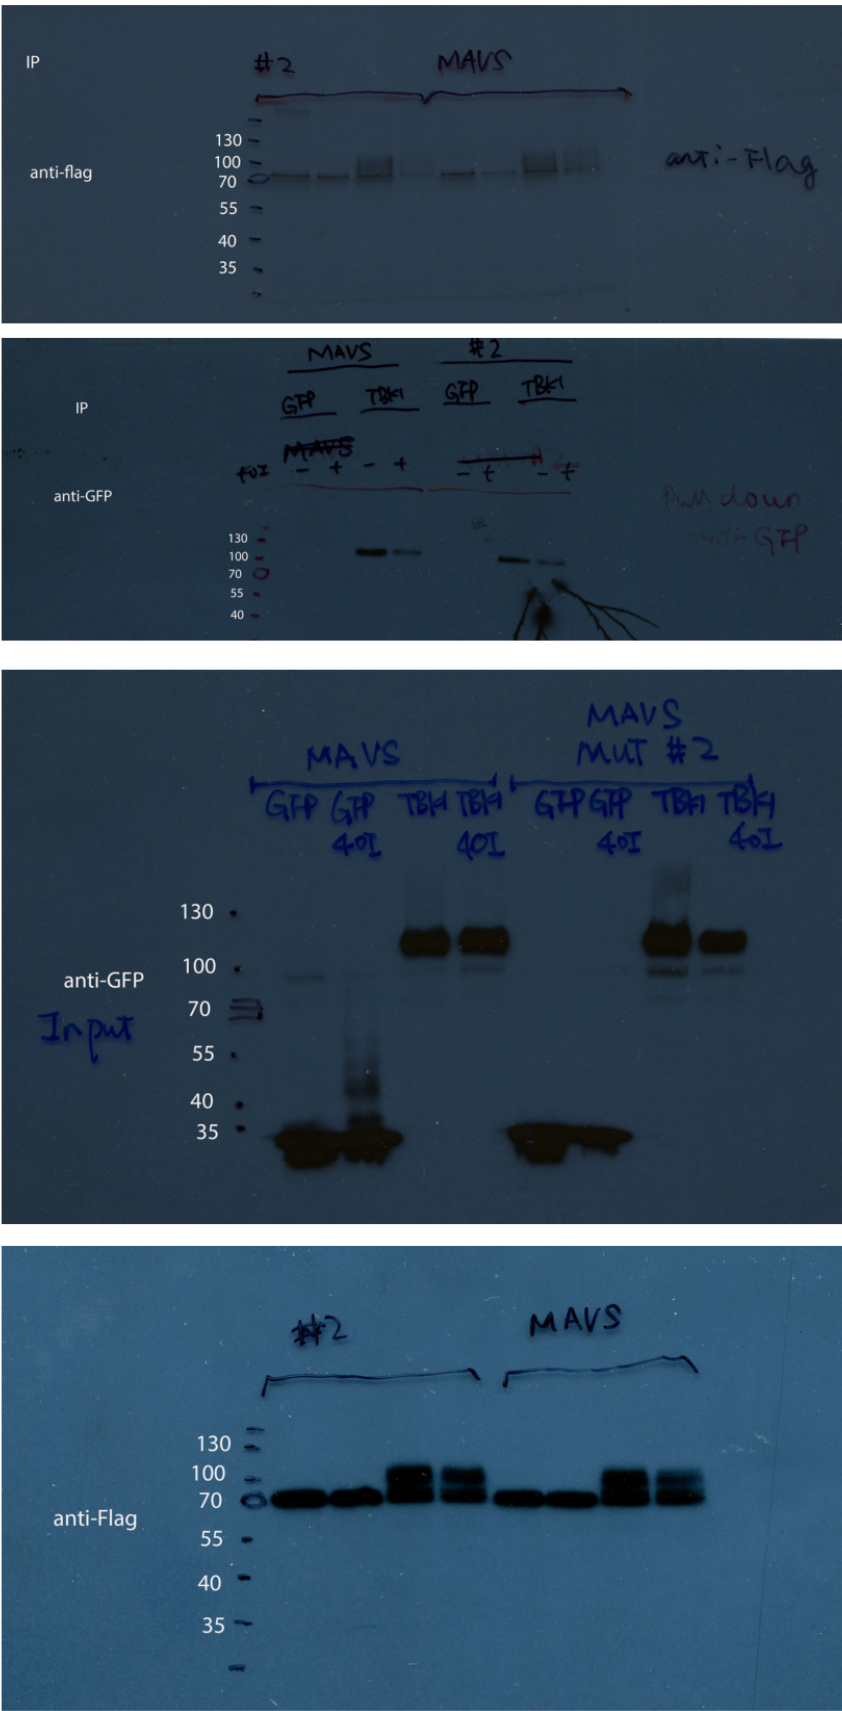

**Fig. 8f**

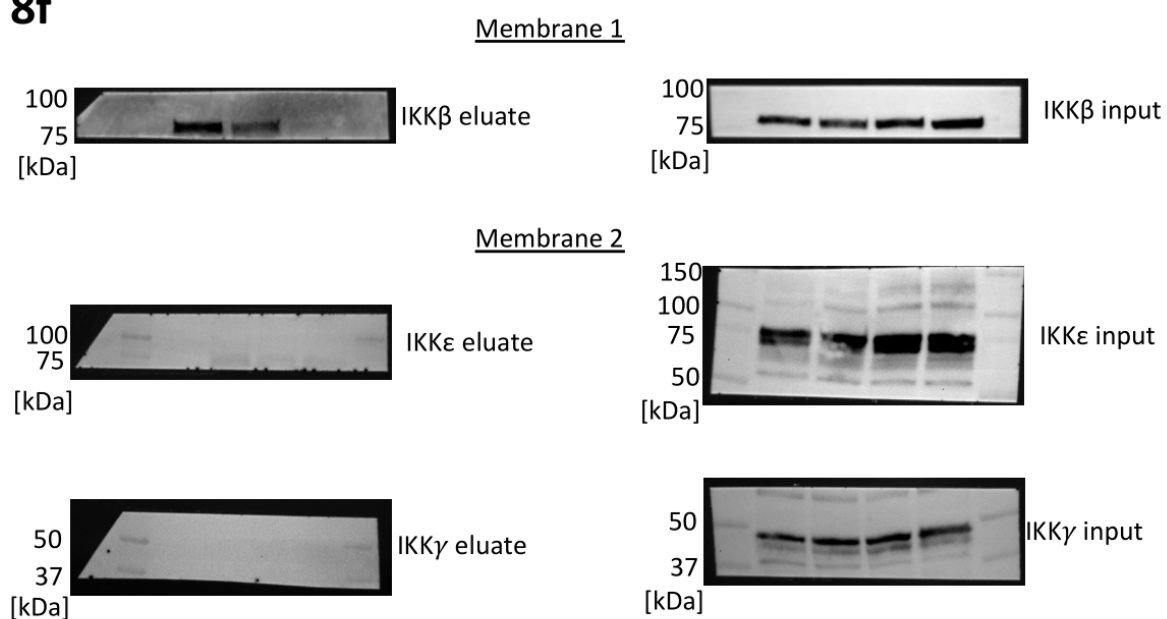

**Fig. 8i**

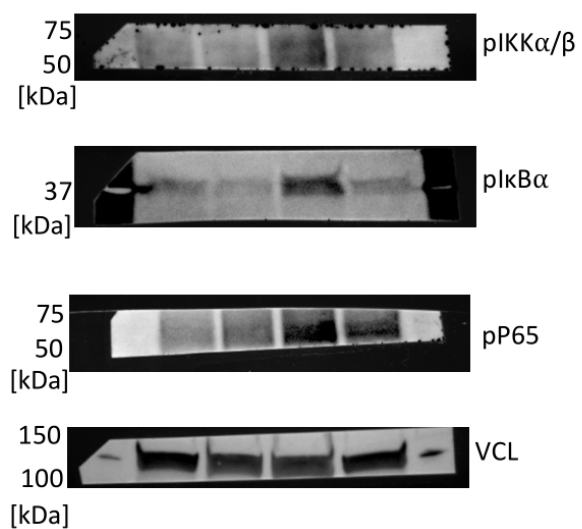

**Fig. 8j**

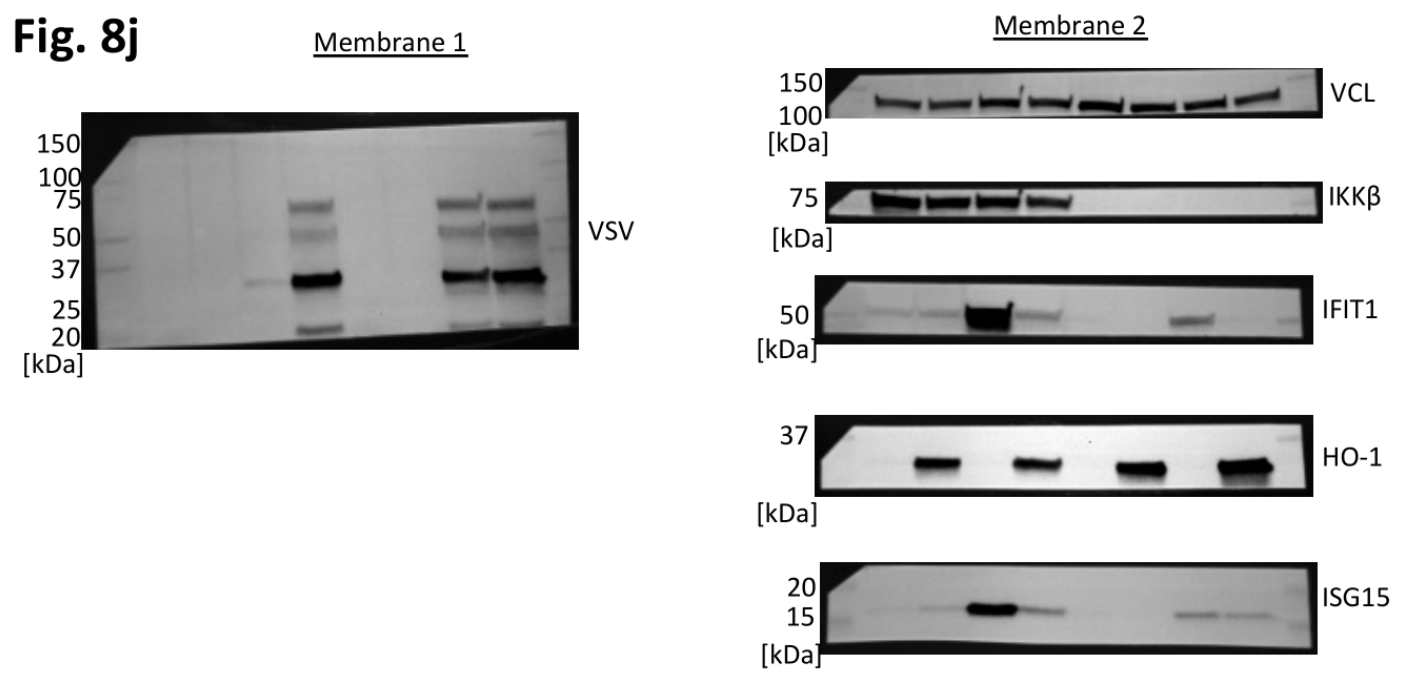

**Fig. S8c**

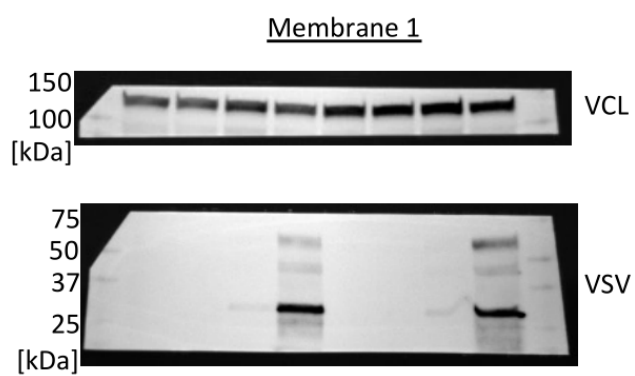

**Fig. S9c**

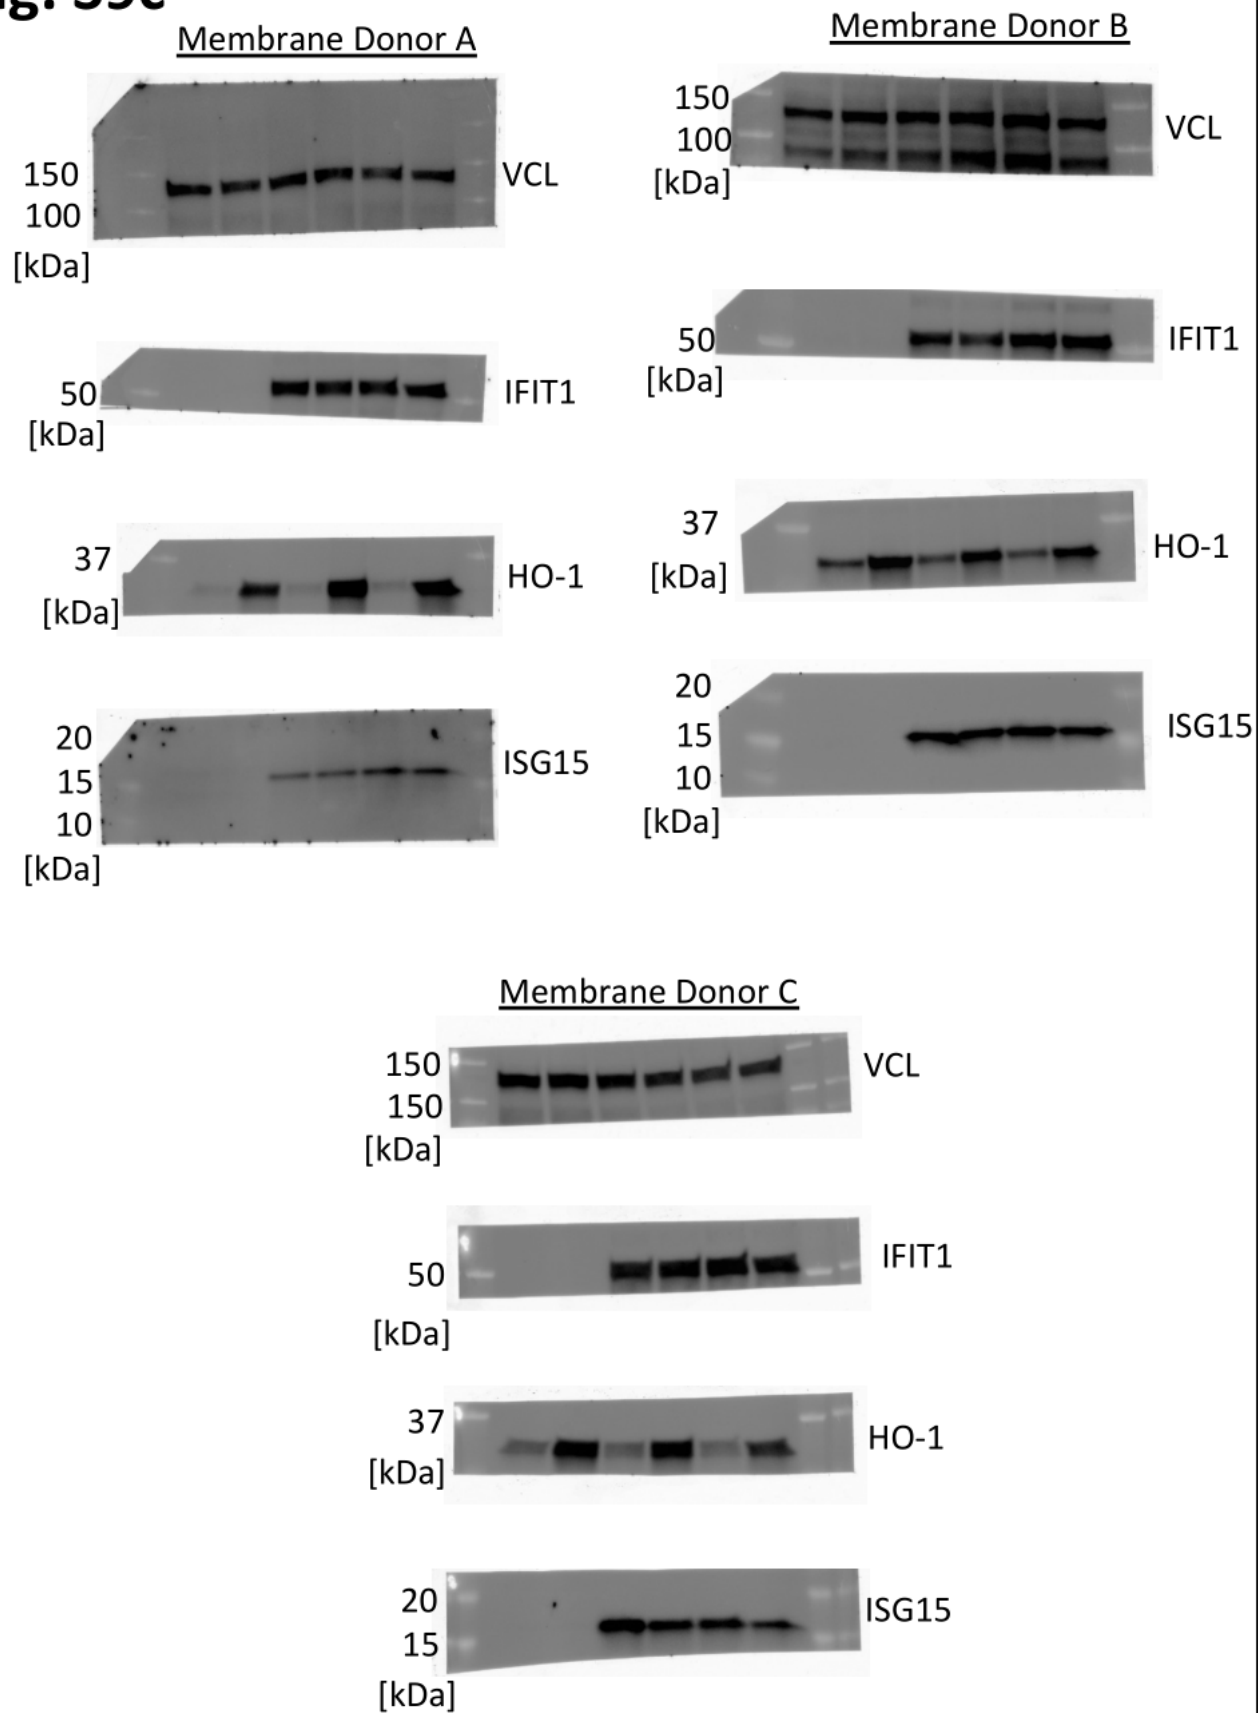

**Fig. S9d**

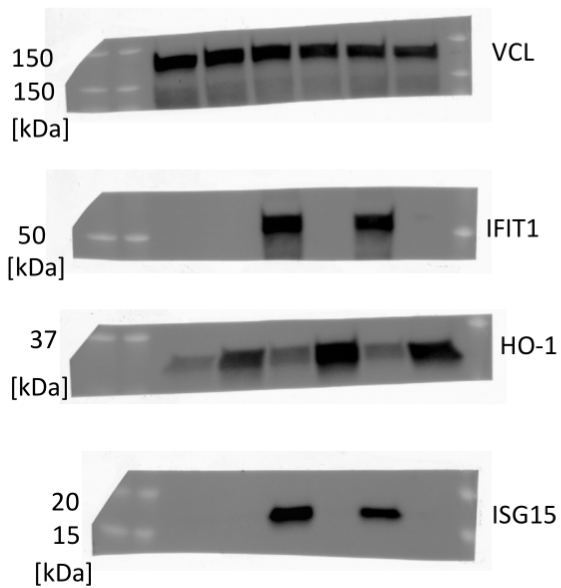

**Fig. S12a**

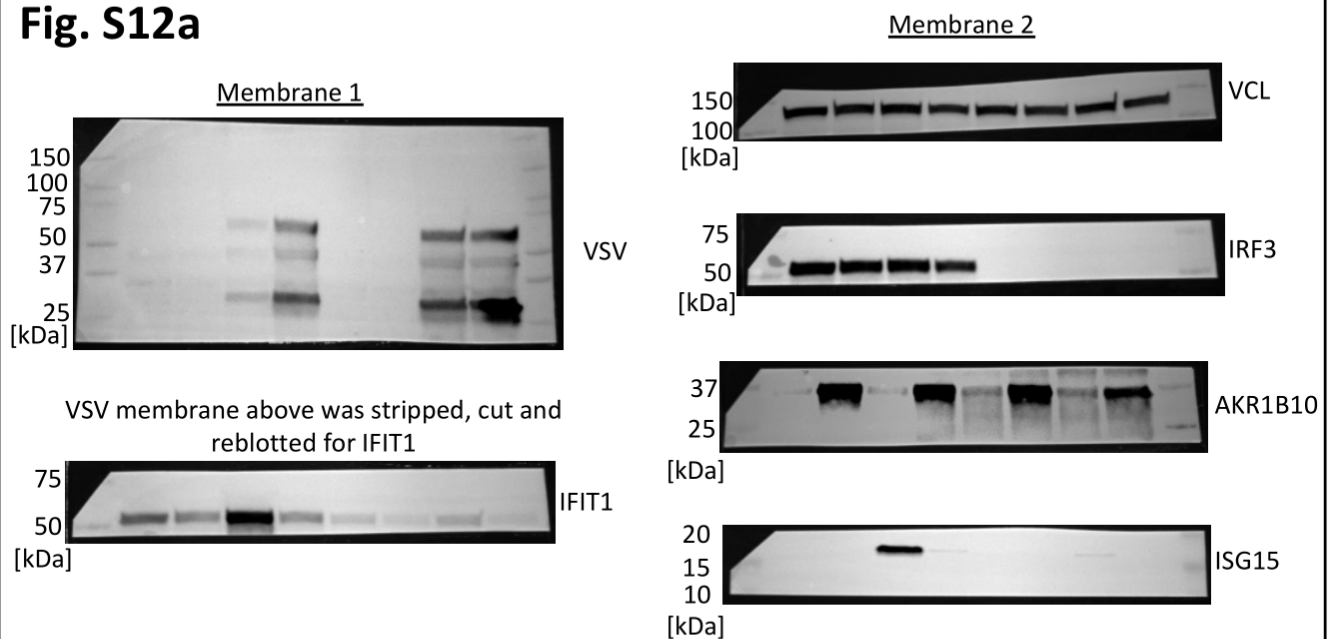

**Fig. S12c**

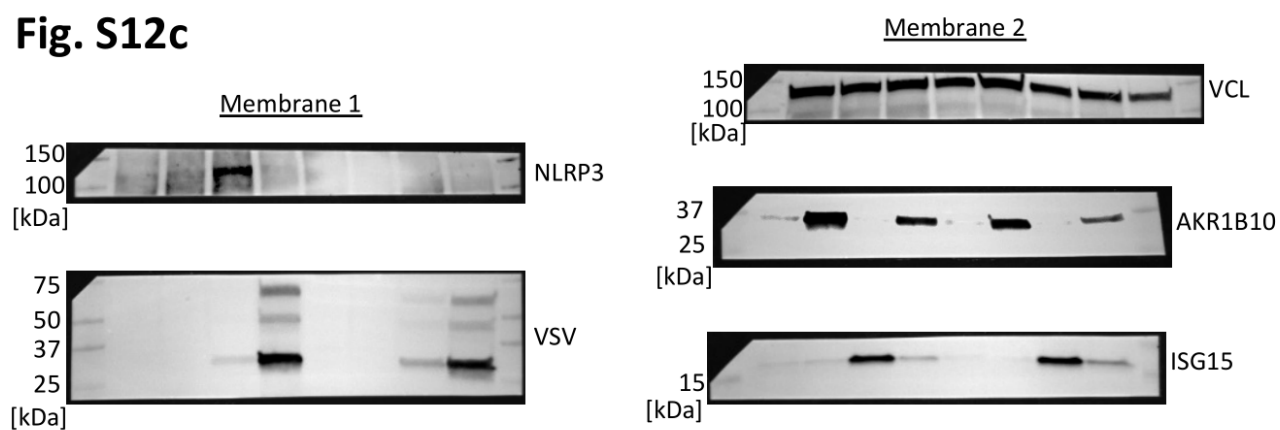

**Fig. S13c**

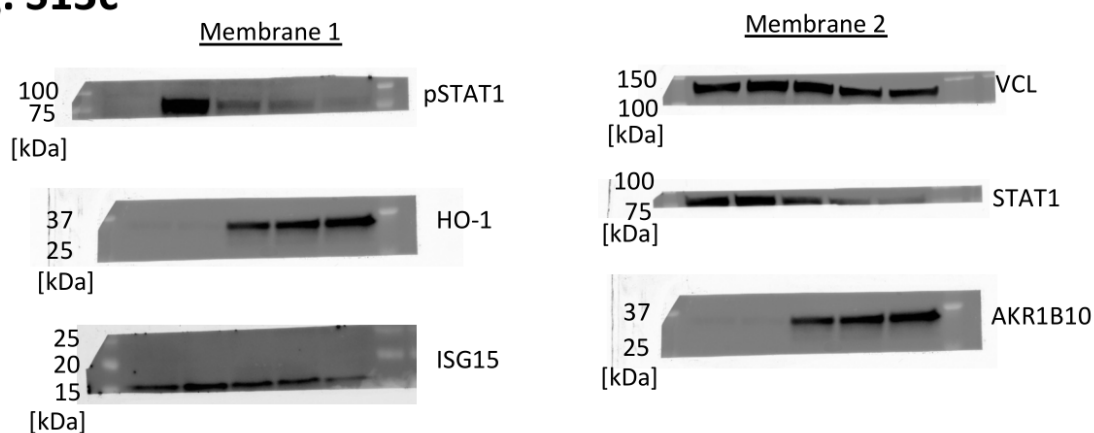

**Fig. S13d**

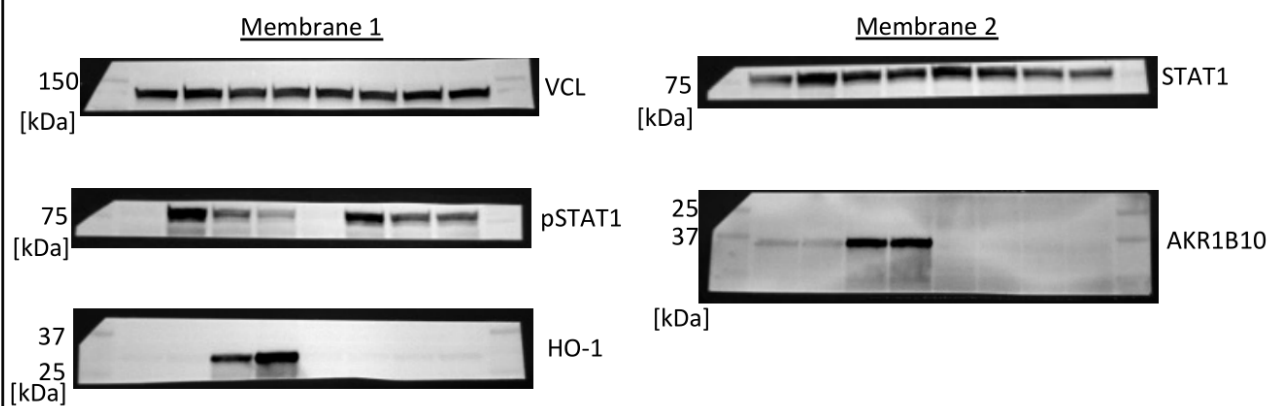

**Fig. S13e**

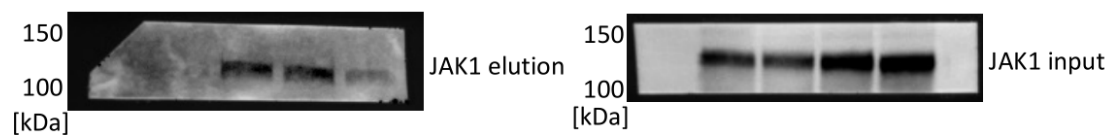

**Fig. S13f**

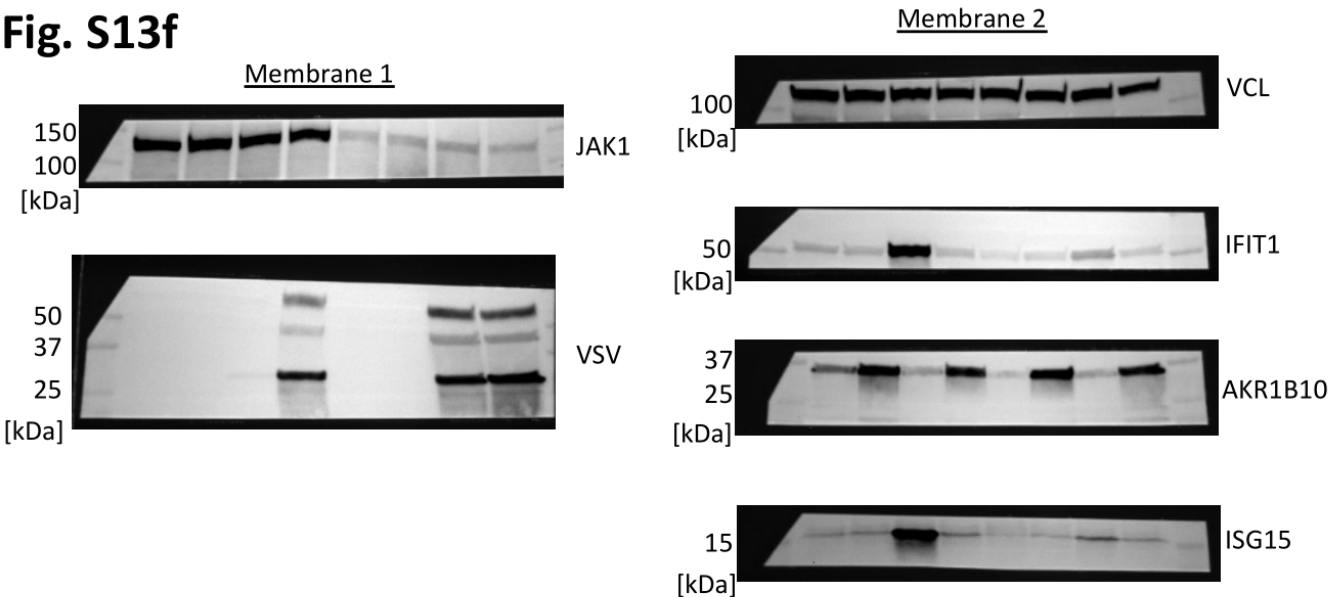

**Fig. S15a**

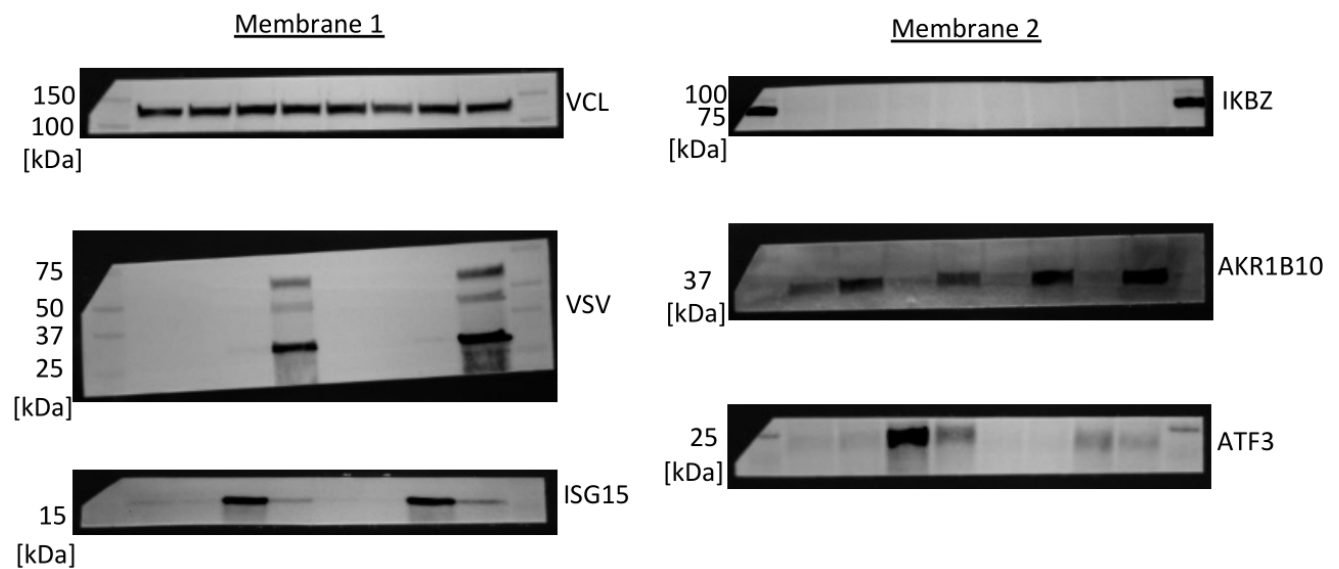

**Fig. S15c**

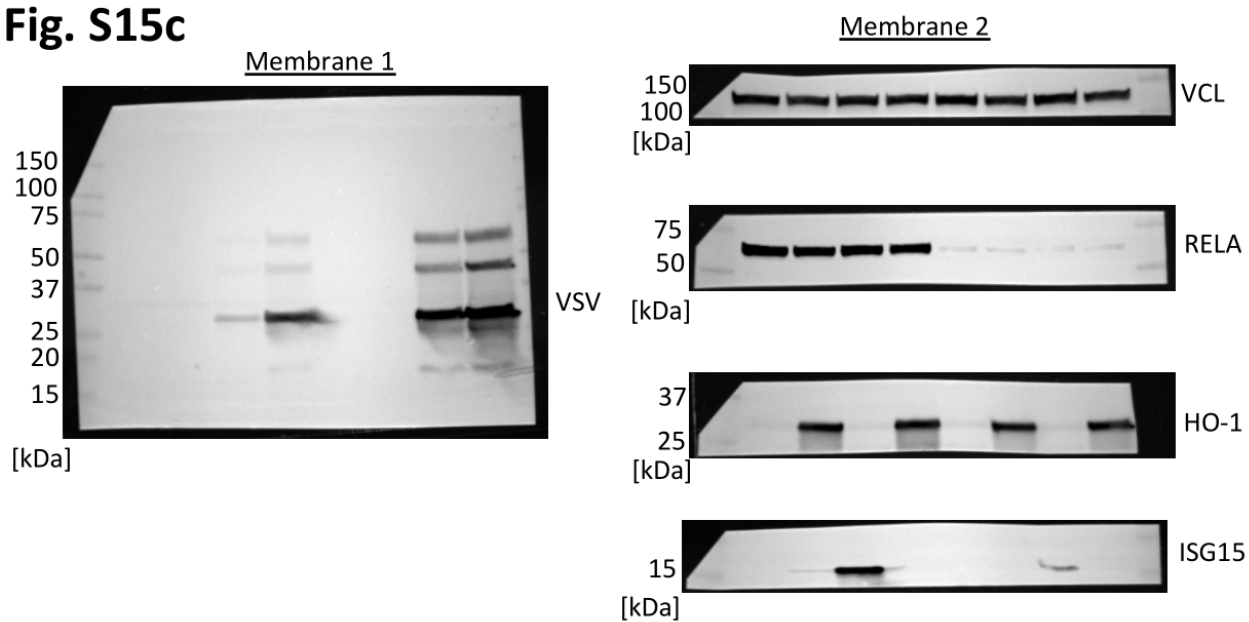

**Fig. S15e**

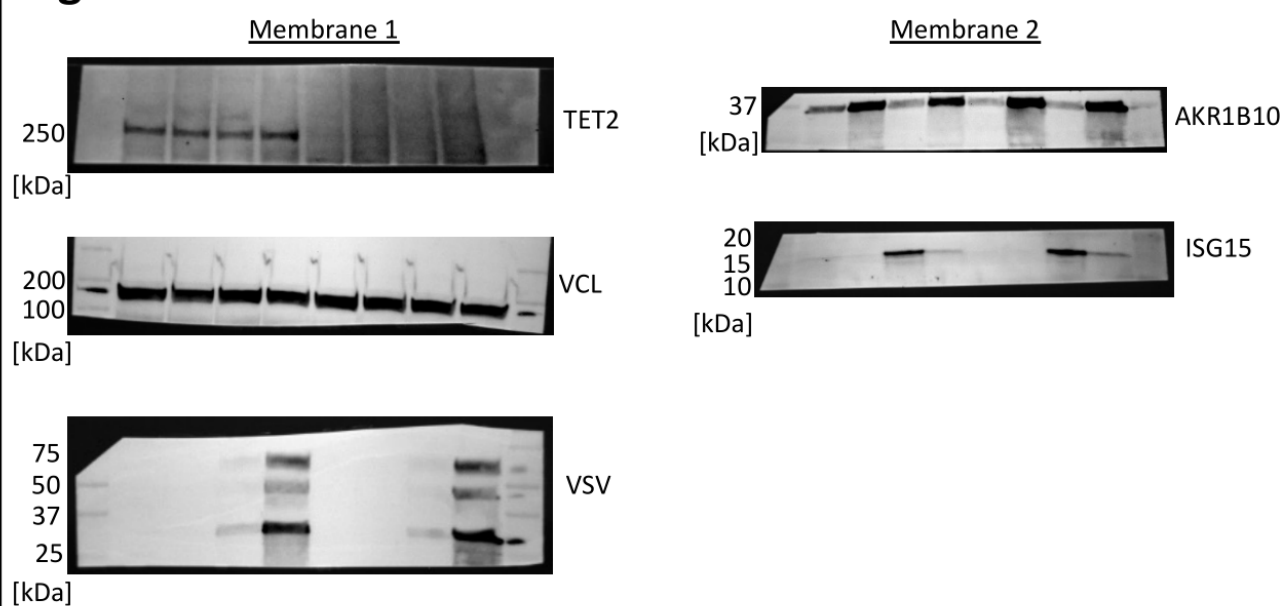

## Supplementary Tables 1-6

| No  | Biobank ID (*) | Age | Sex    | MMR status (**) | Tumor localization | UICC Classification | Prior Radiation Therapy | Prior Chemotherapy | Normal organoids tested |
|-----|----------------|-----|--------|-----------------|--------------------|---------------------|-------------------------|--------------------|-------------------------|
| P1  | O17            | 78  | male   | MMRp            | colon sigmoideum   | IIIC                | -                       | -                  | +                       |
| P2  | O11            | 69  | male   | MMRp            | colon sigmoideum   | I                   | -                       | -                  | -                       |
| P3  | O23            | 59  | male   | MMRp            | rectum             | IIIB                | +                       | +                  | -                       |
| P4  | O29            | 79  | male   | MMRp            | colon descendens   | IIIB                | -                       | +                  | -                       |
| P5  | O06            | 38  | female | MMRp            | colon sigmoideum   | IIIA                | -                       | -                  | +                       |
| P6  | O28            | 68  | male   | MMRp            | flexura hepatica   | IVC                 | -                       | -                  | +                       |
| P7  | O09            | 54  | male   | MMRp            | rectum             | IIIB                | +                       | +                  | -                       |
| P8  | O13            | 76  | male   | MMRp            | colon descendens   | IVB                 | +                       | +                  | -                       |
| P9  | O24            | 55  | male   | MMRp            | rectum             | IVA                 | -                       | +                  | -                       |
| P10 | O07            | 74  | female | MMRd            | caecum             | IVB                 | -                       | -                  | -                       |
| P11 | O02            | 78  | male   | MMRd            | colon ascendens    | IIA                 | -                       | -                  | -                       |
| P12 | O14            | 46  | male   | MMRp            | rectum             | I                   | -                       | -                  | -                       |

(\*) part of the CRC organoid-stroma biobank (*under review*)

(\*\*) organoids with >1000 somatic alterations detected by whole exome sequencing were defined as mismatch repair deficient (dMMR)

**Table S1. Patient characteristics of colorectal organoids used in this study.**

| ID | Age (Years) | Sex    | Tumor localization | Diagnosis                                         |
|----|-------------|--------|--------------------|---------------------------------------------------|
| P1 | 78          | Female | Left, occipital    | Metastasis, malignant melanoma                    |
| P2 | 75          | Male   | Left, frontal      | Newly diagnosed GBM, IDH-wt (WHO IV)              |
| P3 | 60          | Male   | Right, parietal    | Recurrent GBM, IDH-wt (WHO IV), radiochemotherapy |

**Table S2. Clinical data from all brain tumor patients.**

| Binding site | IKK $\beta$ Binding energy score (S) (kcal/mol) |
|--------------|-------------------------------------------------|
| Cys12        | -6.8 to -7.6                                    |
| Cys179       | -7.0 to -8.1                                    |
| Cys412       | -8.2 to -10.0                                   |
| Cys464       | -7.7 to -9.0                                    |
| Cys524       | -6.5 to -7.1                                    |
| Cys716       | -5.1 to -5.7                                    |

**Table S3. Binding energies of 4-OI to different cysteine-containing sites in IKK $\beta$ .**

| Fluorochrome | Target      | Clone                    | Category number | Vendor       | Dilution | Panel   |
|--------------|-------------|--------------------------|-----------------|--------------|----------|---------|
| AF700        | CD8         | 53-6.7                   | 56-0081-82      | Thermofisher | 1:100    | T-cell  |
| AF700        | CD45.2      | <a href="#">104</a>      | 109822          | Biologend    | 1:400    | Myeloid |
| APC          | NKG2a       | <a href="#">16A11</a>    | 142807          | Biologend    | 1:100    | T-cell  |
| APC          | XCR1        | ZET                      | 148206          | Biologend    | 1:200    | Myeloid |
| APC-Cy7      | PD1         | <a href="#">29F.1A12</a> | 135224          | Biologend    | 1:50     | T-cell  |
| APC-Cy7      | CD11c       | N418                     | 117324          | Biologend    | 1:100    | Myeloid |
| BV421        | CD62L       | <a href="#">MEL-14</a>   | 104436          | Biologend    | 1:100    | T-cell  |
| BV421        | MHC-II      | M5/114                   | 562564          | BD           | 1:400    | Myeloid |
| BV510        | Zombie Aqua |                          | 423101          | Biologend    | 1:800    | All     |
| BV605        | CD69        | <a href="#">H1.2F3</a>   | 104530          | Biologend    | 1:100    | T-cell  |
| BV605        | Ly6C        | HK1.4                    | 128036          | Biologend    | 1:500    | Myeloid |
| BV650        | NK1.1       | PK136                    | 564143          | BD           | 1:100    | T-cell  |
| BV650        | Siglec-H    | 440c                     | 747672          | BD           | 1:300    | Myeloid |
| BV711        | CD4         | <a href="#">RM4-5</a>    | 100549          | Biologend    | 1:200    | T-cell  |
| BV711        | CD103       | <a href="#">2E7</a>      | 121435          | Biologend    | 1:200    | Myeloid |
| BV786        | CD44        | <a href="#">IM7</a>      | 103059          | Biologend    | 1:100    | T-cell  |
| BV786        | Ly6G        | 1A8                      | 127645          | Biologend    | 1:400    | Myeloid |
| FITC         | CD45.2      | <a href="#">104</a>      | 109806          | Biologend    | 1:200    | T-cell  |
| FITC         | CD11b       | ICRF44                   | 562793          | BD           | 1:500    | Myeloid |
| PE           | Foxp3       | FJK-16s                  | 12-5773-80      | Thermofisher | 1:200    | T-cell  |
| PE           | CD86        | GL-1                     | 105007          | Biologend    | 1:400    | Myeloid |
| PECF594      | CD3         | 145-2C11                 | 562286          | BD           | 1:200    | All     |
| PE-Cy7       | KLRG-1      | 2F1                      | 25-5893-82      | Invitrogen   | 1:200    | T-cell  |
| PE-Cy7       | F4/80       | BM8                      | 123112          | Biologend    | 1:100    | Myeloid |
|              | CD16/CD32   | 2.4G2                    | 553142          | BD           | 1:250    | All     |

**Table S4. Listing of antibodies used in the *in vivo* immunophenotyping experiment.**

| Target  | F/R     | Sequence                    |
|---------|---------|-----------------------------|
| VSV     | Forward | CCTGATGACATTGAGTATACATCTCTT |
| VSV     | Reverse | GGATCCTACTGCATAAGCGTACA     |
| ISG15   | Forward | GGAACGAAAGGGGCCACAGCA       |
| ISG15   | Reverse | CCTCCATGGGCCTTCCCTCGA       |
| NFKB    | Forward | CACCTAGCTGCCAAAGAAGG        |
| NFKB    | Reverse | GCAGGCTATTGCTCATACA         |
| CXCL9   | Forward | TGGAGTTCGAGGAACCCTAGT       |
| CXCL9   | Reverse | AGGCAGGTTTGATCTCCGTT        |
| Mzt2    | Forward | TCGGTGCCCATATCTCTGTC        |
| Mzt2    | Reverse | CTGCTTCGGGAGTTGCTTTT        |
| Ptp4a   | Forward | AGCCCTGTGGAGATCTCTT         |
| Ptp4a   | Reverse | AGCATCACAACTCGAACCA         |
| MX1     | Forward | CTGGAAGCACTGTCTGGAGT        |
| MX1     | Reverse | GGCCTCTTCCACCTCTGAAG        |
| HMOX1   | Forward | GGTCAGGTGTCCAGAGAAGG        |
| HMOX1   | Reverse | ATGATTTCTGCCAGTGAGG         |
| IL6     | Forward | AACGATGATGCACTTGCAGA        |
| IL6     | Reverse | CTCTGAAGGACTCTGGCTTTG       |
| IFIT1   | Forward | CTGGACAAGGTGGAGAAGGT        |
| IFIT1   | Reverse | AGGGTTTTCTGGCTCCACTT        |
| IL1b    | Forward | GACCTTCCAGGATGAGGACA        |
| IL1b    | Reverse | AGCTCATATGGGTCCGACAG        |
| TNF     | Forward | GAAGTGGCAGAAGAGGCACT        |
| TNF     | Reverse | AGGGTCTGGGCCATAGAACT        |
| IFNbeta | Forward | AGAAAGGACGAACATTCGAAA       |
| IFNbeta | Reverse | CCGTCATCTCCATAGGGATCTT      |
| Viperin | Forward | TTGGGCAAGCTTGTGAGATTC       |
| Viperin | Reverse | TGAACCATCTCTCTGGATAAGG      |

**Table S5. Listing of the primers used for the *in vivo* intratumoral qPCR experiments.**

| Name       | Sequence                |
|------------|-------------------------|
| hsMx1-F    | GTTTCCGAAGTGGACATCGCA   |
| hsMx1-R    | CTGCACAGGTTGTCTCAGC     |
| hslSG15-F  | CGCAGATCACCCAGAAGATCG   |
| hslSG15-R  | TTCGTCGCATTGTCCACCA     |
| hslIFNB1-F | ATGACCAACAAGTGTCTCCTCC  |
| hslIFNB1-R | GGAATCCAAGCAAGTTGTAGCTC |
| hslIFIT1-F | TTGATGACGATGAAATGCCTGA  |
| hslIFIT1-R | CAGGTCACCAGACTCCTCAC    |
| hsTNF-F    | CCTCTCTAATCAGCCCTCTG    |
| hsTNF-R    | GAGGACCTGGGAGTAGATGAG   |
| hslIL6-F   | ACTCACCTCTTCAGAACGAATTG |
| hslIL6-R   | CCATCTTTGGAAGGTTGAGGTTG |
| hslIL1b-F  | ATGATGGCTTATTACAGTGGCAA |
| hslIL1b-R  | GTCGGAGATTCTGAGCTGGA    |
| hsHPRT1-F  | CCTGGCGTCGTGATTAGTGAT   |
| hsHPRT1-R  | AGACGTTCAAGTCTGTCCATAA  |

**Table S6. Listing of the primers used for qPCR on measles, reovirus and vaccinia virus-infected cells.**

## **Supplementary Methods**

### **Copies of NMR spectra**

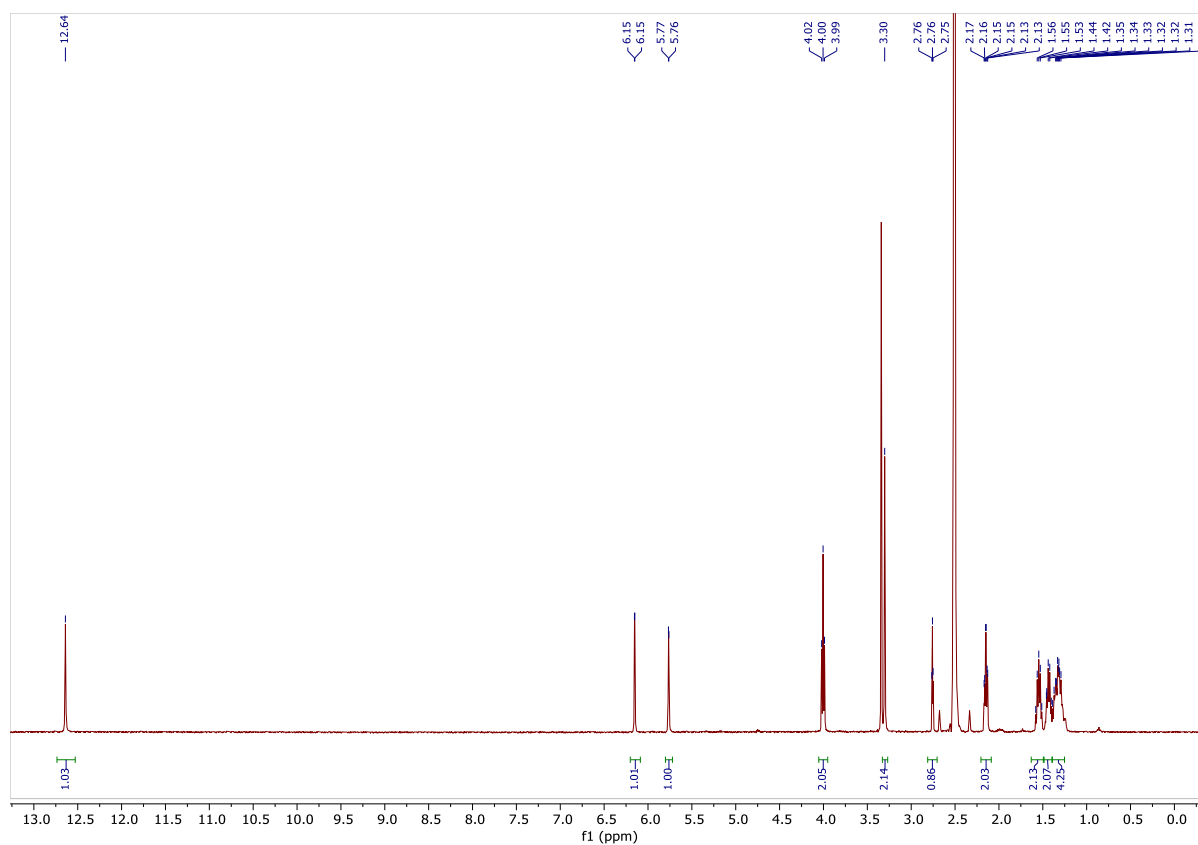

Figure: <sup>1</sup>H NMR spectrum (400 MHz, DMSO-*d*<sub>6</sub>) of 4-OI-alk

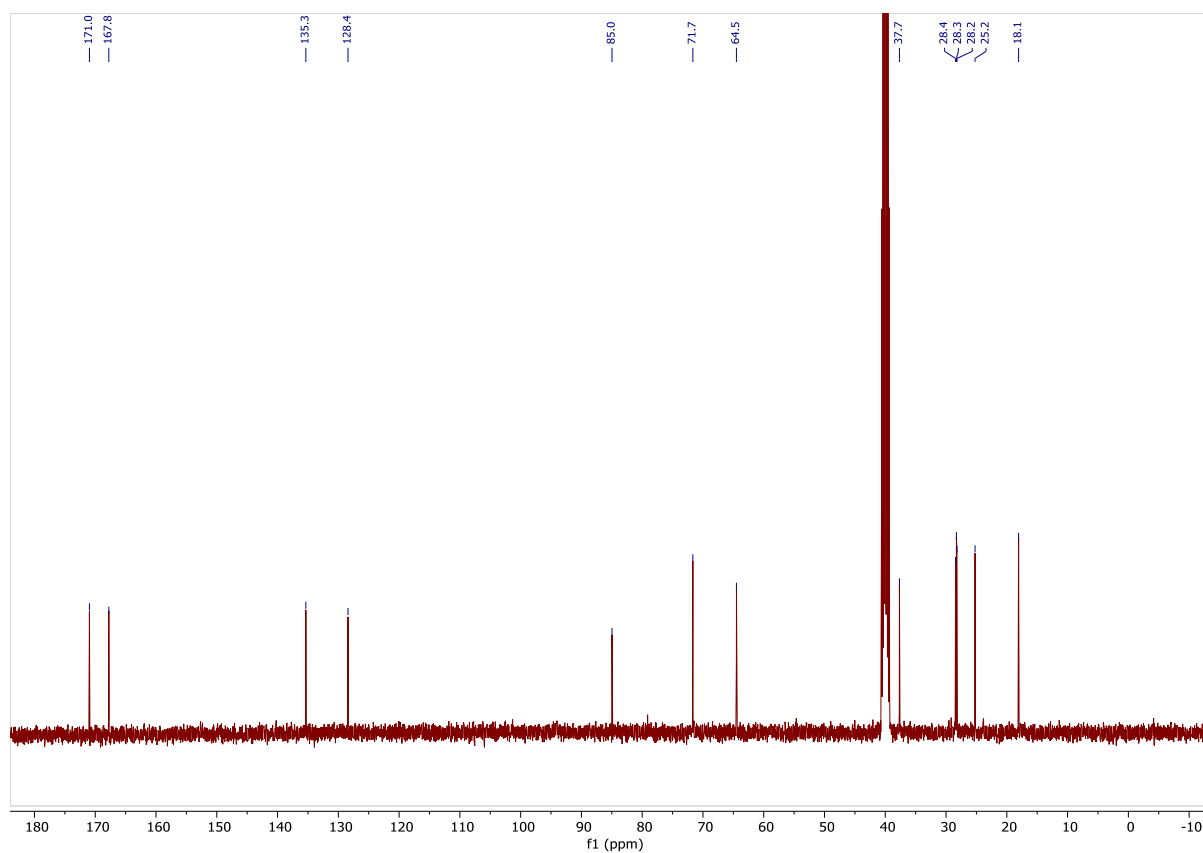

Figure: <sup>13</sup>C NMR spectrum (101 MHz, DMSO-*d*<sub>6</sub>) of 4-OI-alk

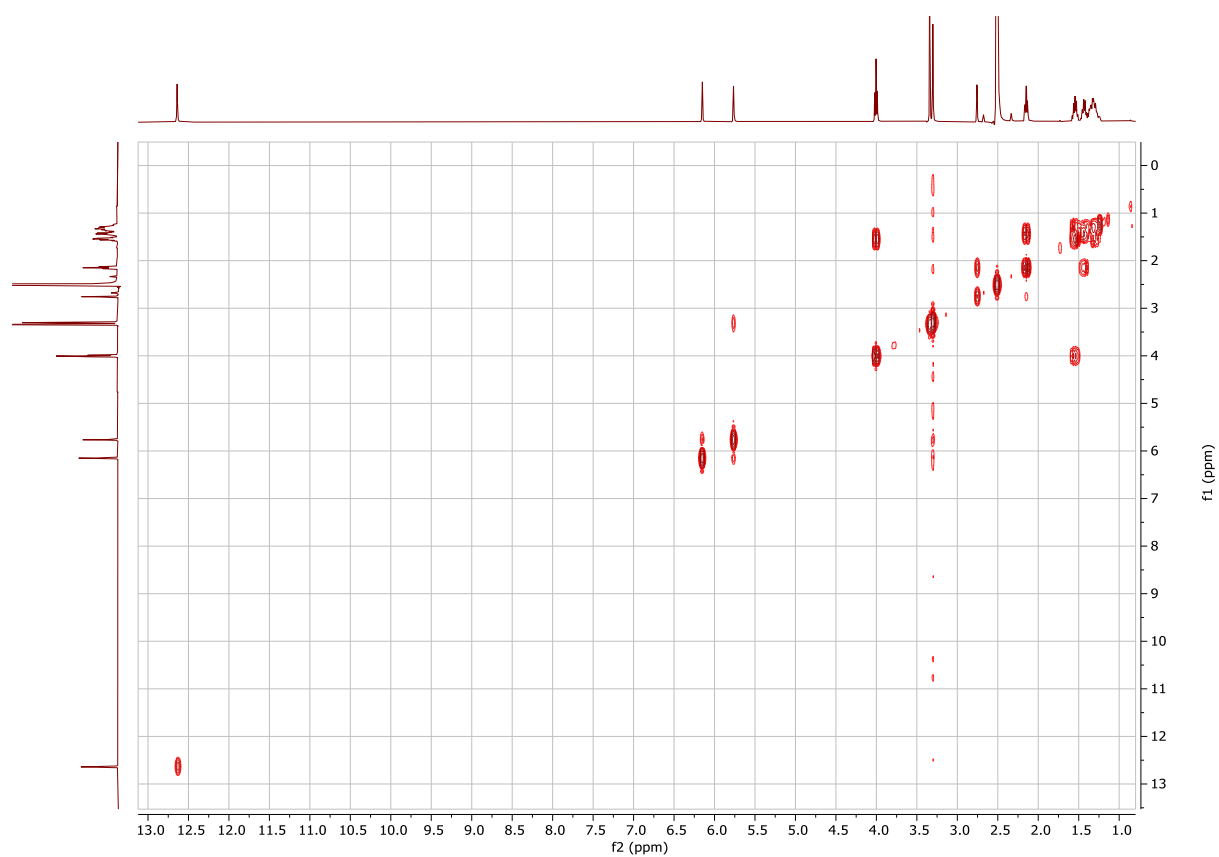

Figure: COSY spectrum (400 MHz, DMSO- $d_6$ ) of **4-OI-alk**

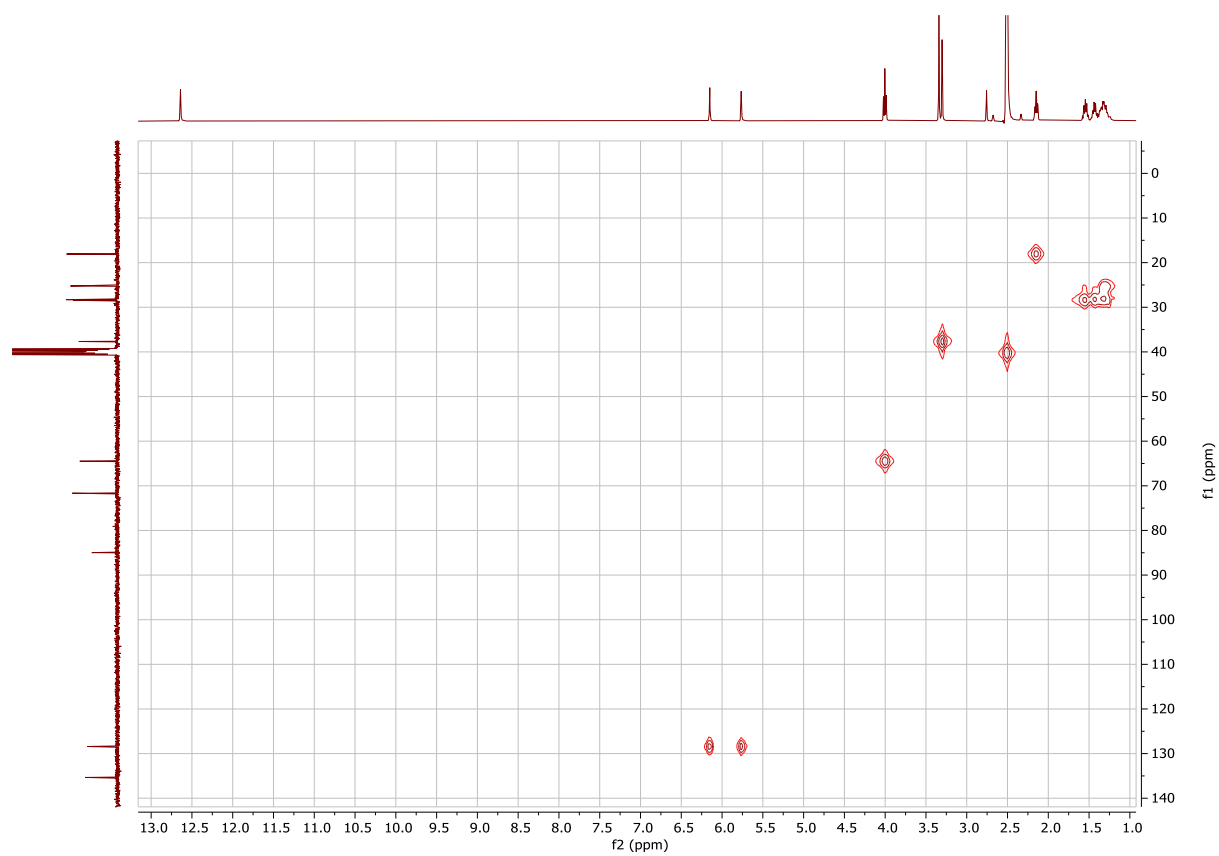

Figure: HSQC NMR spectrum (400/101 MHz, DMSO- $d_6$ ) of **4-OI-alk**

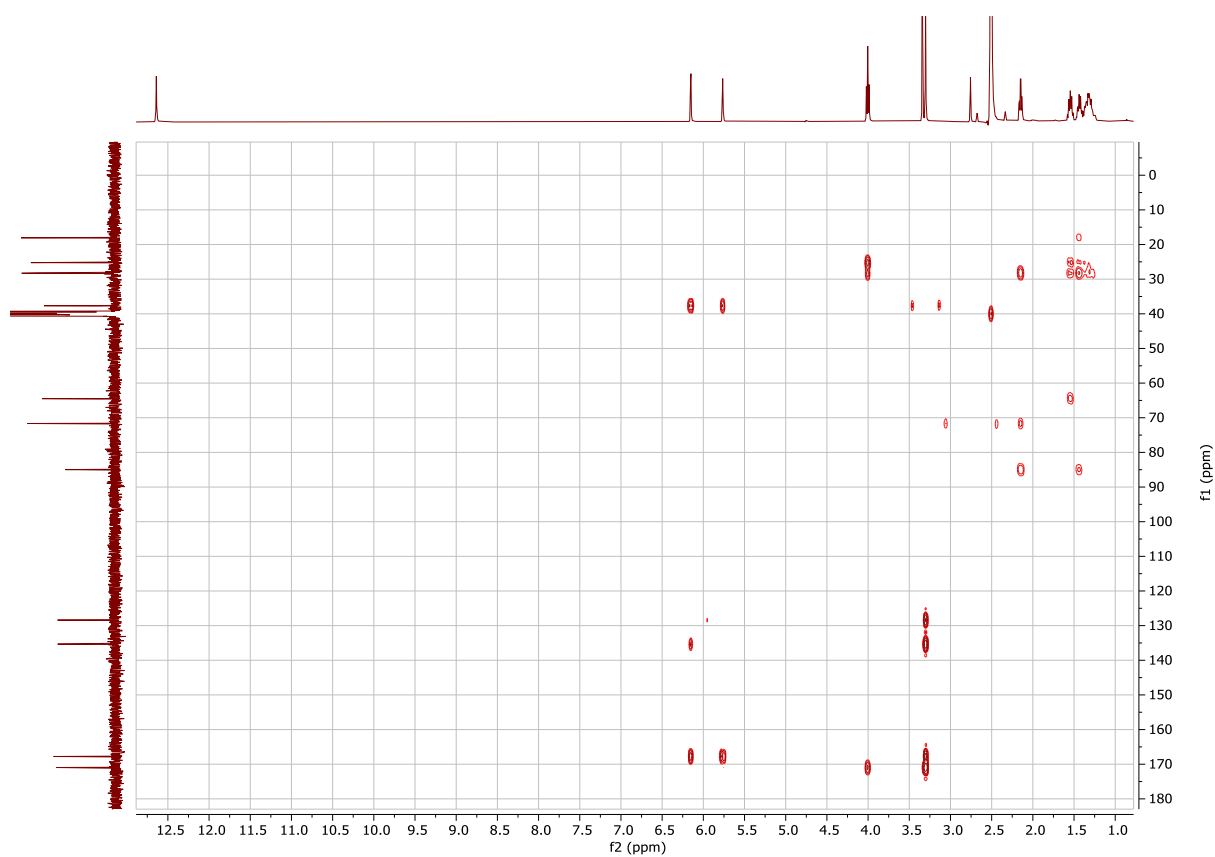

Figure : HMBC NMR spectrum (400/101 MHz, DMSO- $d_6$ ) of **4-OI-alk**

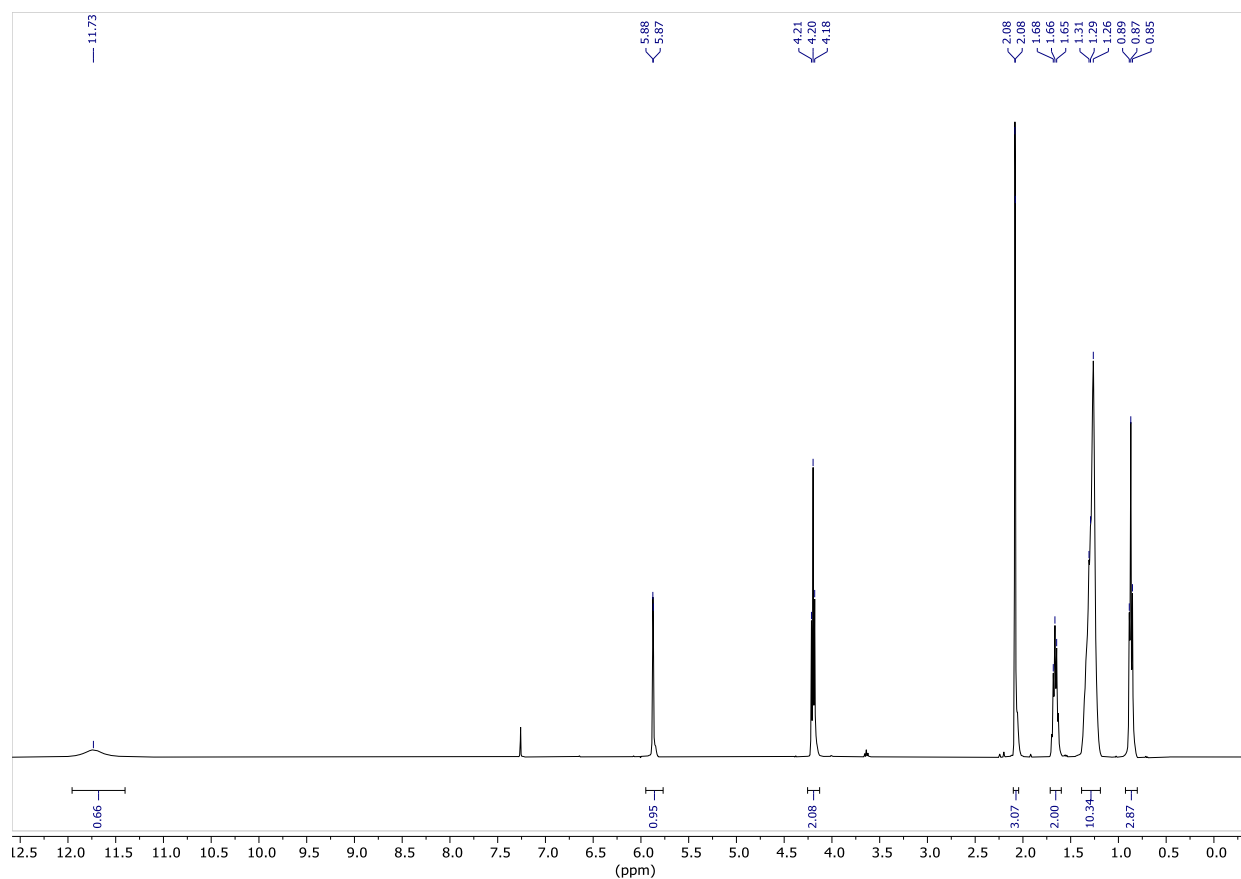

Figure:  $^1\text{H}$  NMR spectrum (400 MHz,  $\text{CDCl}_3$ ) of **1-OC (HS)**

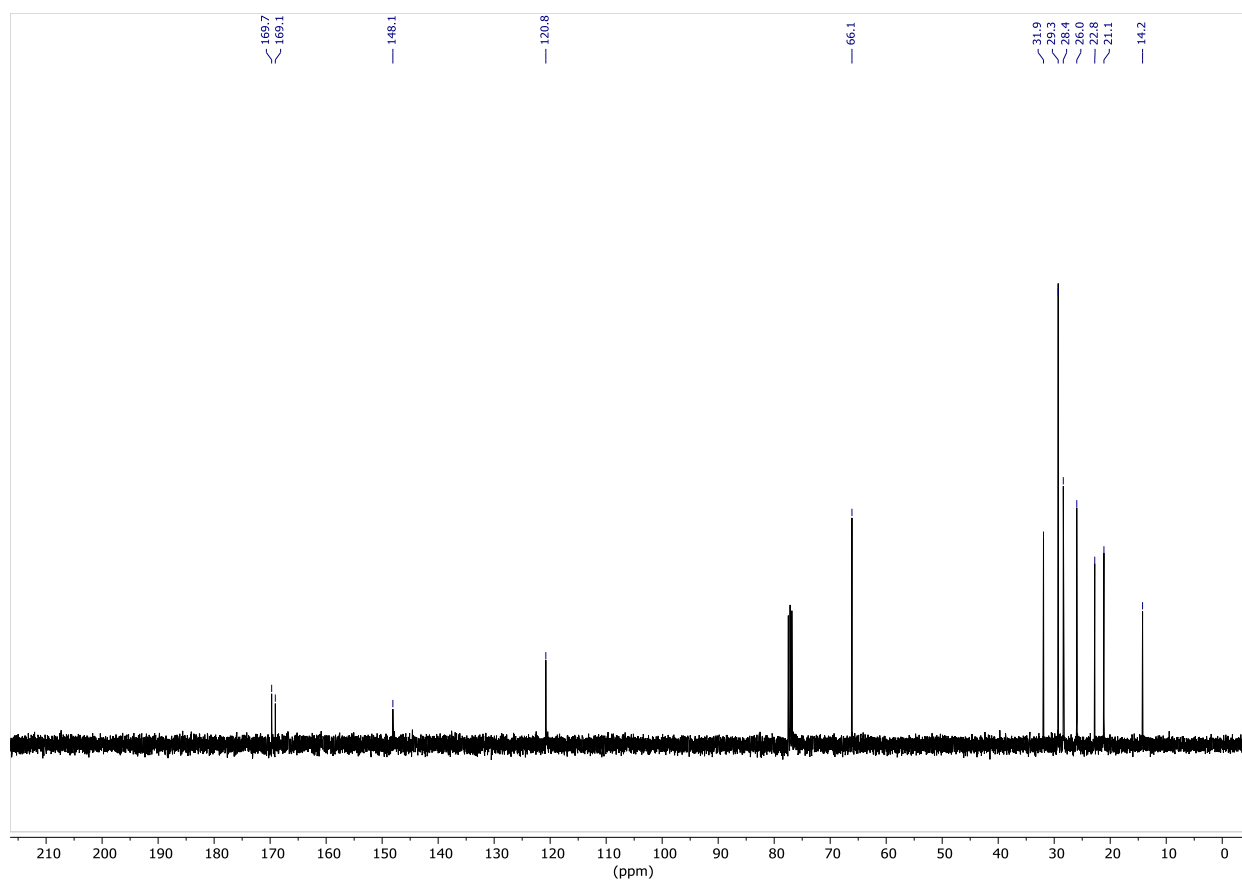

Figure: <sup>13</sup>C NMR spectrum (101 MHz, CDCl<sub>3</sub>) of **1-OC (HS)**

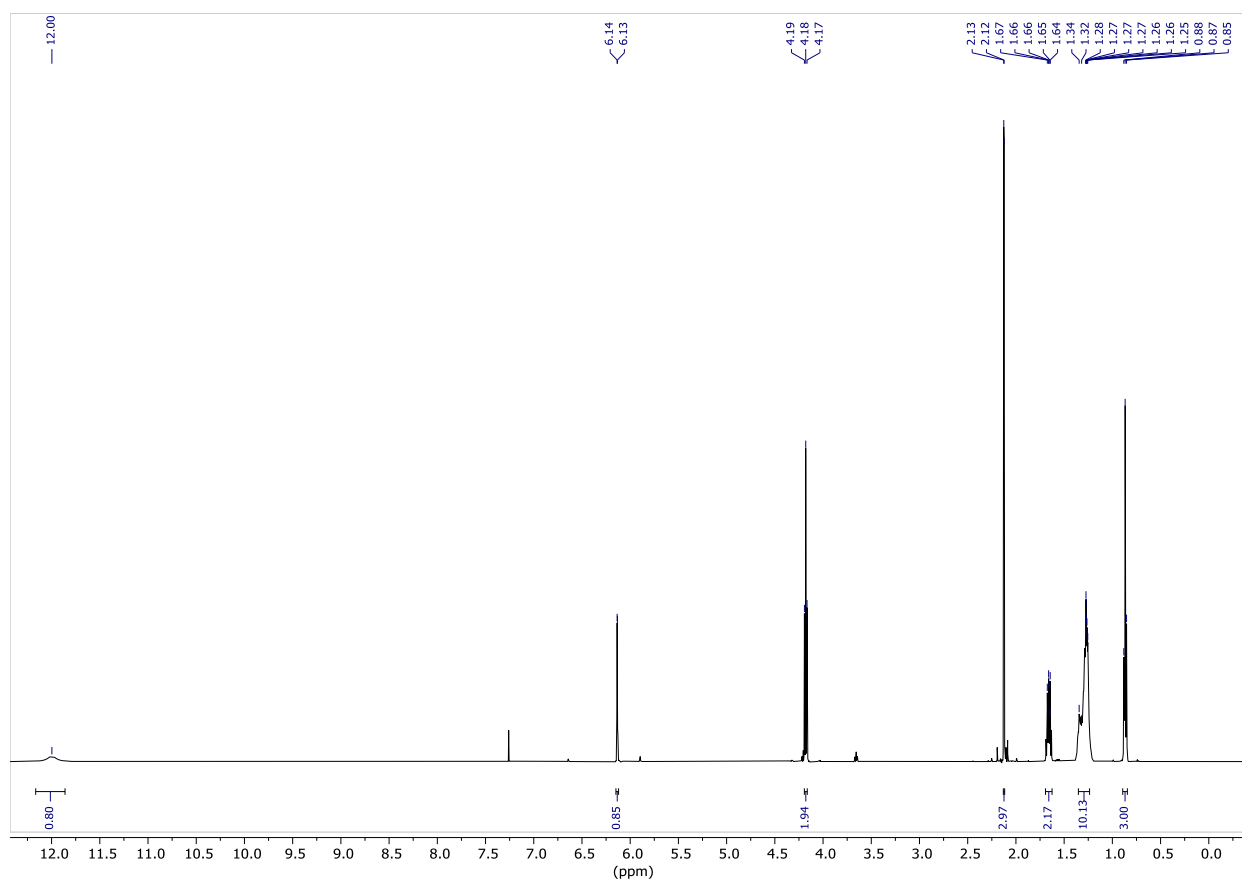

Figure: <sup>1</sup>H NMR spectrum (400 MHz, CDCl<sub>3</sub>) of **4-OC (LS)**

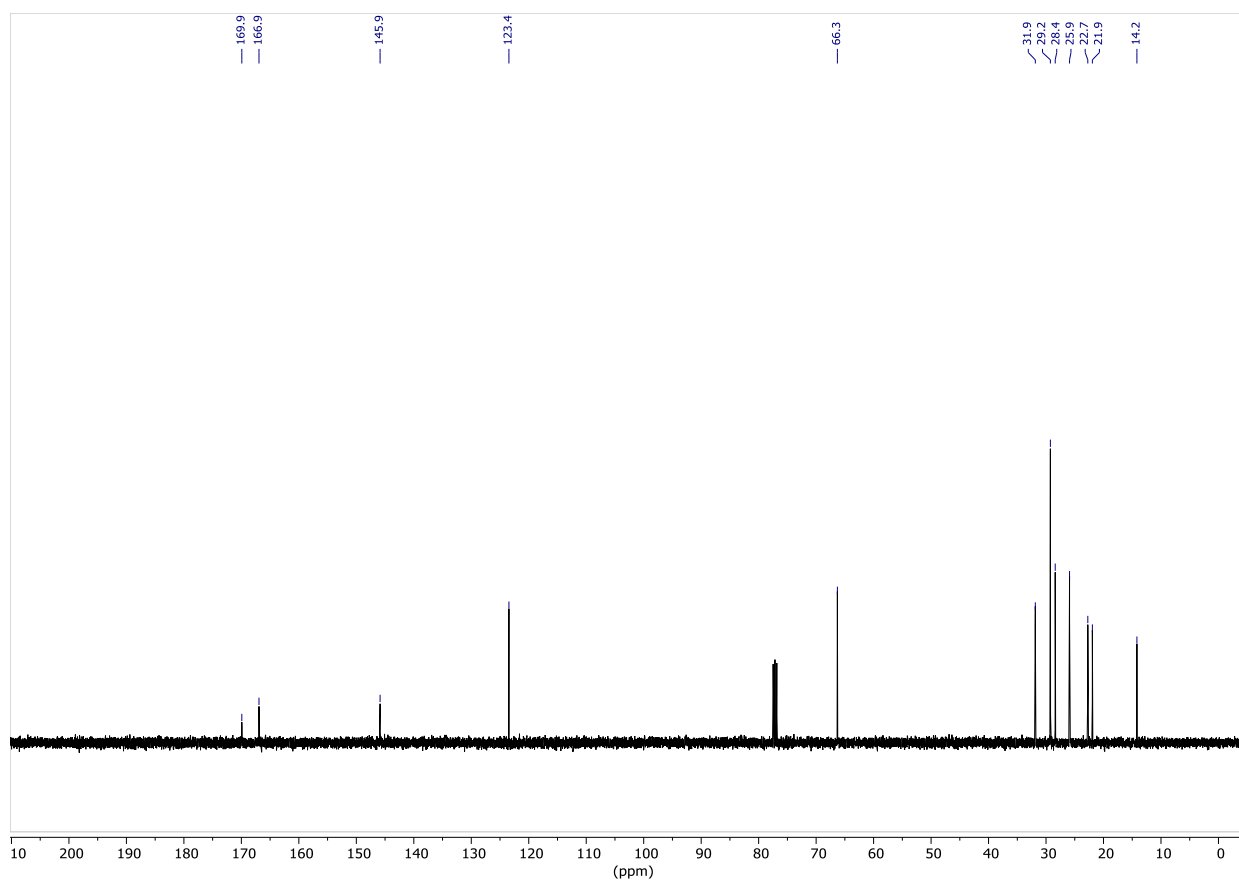

Figure:  $^{13}\text{C}$  NMR spectrum (101 MHz,  $\text{CDCl}_3$ ) of 4-OC (HS)
